1 **Tamm-Horsfall protein augments neutrophil NETosis during urinary tract infection**

2 Vicki Mercado-Evans<sup>1,2</sup>, Claude Chew<sup>3</sup>, Camille Serchejian<sup>1</sup>, Alexander Saltzman<sup>4</sup>, Marlyd E.  
3 Mejia<sup>1</sup>, Jacob J. Zulk<sup>1</sup>, Ingrid Cornax<sup>5\*</sup>, Victor Nizet<sup>5,6</sup>, Kathryn A. Patras<sup>1,7,#</sup>

4

5 <sup>1</sup>Department of Molecular Virology and Microbiology, Baylor College of Medicine, Houston,  
6 Texas, USA

7 <sup>2</sup>Medical Scientist Training Program, Baylor College of Medicine, Houston, Texas, USA

8 <sup>3</sup>Cytometry and Cell Sorting Core, Baylor College of Medicine, Houston, Texas, USA

9 <sup>4</sup>Mass Spectrometry Proteomics Core, Baylor College of Medicine, Houston, Texas, USA

10 <sup>5</sup>Department of Pediatrics, UC San Diego, La Jolla, California, USA

11 <sup>6</sup>Skaggs School of Pharmacy and Pharmaceutical Sciences, UC San Diego, La Jolla, California,  
12 USA

13 <sup>7</sup>Alkek Center for Metagenomics and Microbiome Research, Baylor College of Medicine,  
14 Houston, Texas, USA

15

16 \*Current address: Altos Labs, Inc., San Diego, California, USA

17

18 #Corresponding author: Kathryn Patras, One Baylor Plaza, Houston, TX, 77030, +1 713-798-  
19 5732, [katy.patras@bcm.edu](mailto:katy.patras@bcm.edu)

20

21 Keywords: urinary tract infection, uropathogenic E. coli, neutrophil, NETosis, Tamm-Horsfall  
22 protein

23

24 Conflict of interest statement: The authors have declared that no conflict of interest exists.

25

26

27 **ABSTRACT**

28 Urinary neutrophils are a hallmark of urinary tract infection (UTI), yet the mechanisms governing  
29 their activation, function, and efficacy in controlling infection remain incompletely understood.  
30 Tamm-Horsfall glycoprotein (THP), the most abundant protein in urine, uses terminal sialic acids  
31 to bind an inhibitory receptor and dampen neutrophil inflammatory responses. We hypothesized  
32 that neutrophil modulation is an integral part of THP-mediated host protection. In a UTI model,  
33 THP-deficient mice showed elevated urinary tract bacterial burdens, increased neutrophil  
34 recruitment, and more severe tissue histopathological changes compared to WT mice.  
35 Furthermore, THP-deficient mice displayed impaired urinary NETosis during UTI. To investigate  
36 the impact of THP on NETosis, we coupled *in vitro* fluorescence-based NET assays, proteomic  
37 analyses, and standard and imaging flow cytometry with peripheral human neutrophils. We  
38 found that THP increases proteins involved in respiratory chain, neutrophil granules, and  
39 chromatin remodeling pathways, enhances NETosis in an ROS-dependent manner, and drives  
40 NET-associated morphologic features including nuclear decondensation. These effects were  
41 observed only in the presence of a NETosis stimulus and could not be solely replicated with  
42 equivalent levels of sialic acid alone. We conclude that THP is a critical regulator of NETosis in  
43 the urinary tract, playing a key role in host defense against UTI.

44

45

46

47

48

49

50

## 51 INTRODUCTION

52 Urinary tract infections (UTI) impact around 400 million people globally each year, with  
53 approximately half of all women experiencing at least one UTI during their lifetime(1-3). The  
54 most common culprit of UTIs, responsible for upwards of 75% of cases, is uropathogenic  
55 *Escherichia coli* (UPEC)(1, 4, 5). Genetic factors that increase UTI susceptibility include variants  
56 in bacterial ligand recognition, innate immune signaling and neutrophil recruitment(6-8). A  
57 hallmark clinical feature of UTI is the rapid recruitment of neutrophils following *E. coli*  
58 introduction(9, 10) corresponding with the onset of UTI symptoms(11). Murine models  
59 demonstrate that successful resolution of UTI requires a robust neutrophil response.  
60 Neutrophils, the initial responders to UTI, are detected in urine as early as 2 hours post-  
61 infection(12-14). In line with clinical observations of genetic risk factors, aberrant neutrophil  
62 recruitment in mice leads to pathological neutrophil accumulation, tissue damage, and  
63 scarring(15, 16), whereas antibody-mediated neutrophil depletion exacerbates bacterial burdens  
64 and promotes chronic infection(12, 17).

65  
66 Neutrophils display diverse antibacterial functions that contribute to the resolution of UTI. They  
67 are a critical source of antimicrobial proteins including cathelicidin(18, 19) and lactoferrin(20, 21)  
68 and are the principal cell type performing bacterial phagocytosis *in vivo*(22). Additionally,  
69 neutrophils are a key source of reactive oxygen species, essential for bacterial killing, but which  
70 in excess can promote tissue damage, particularly in the kidneys(23, 24). Neutrophils isolated  
71 from patients with recurrent UTI display decreased phagocytosis and reduced production of  
72 reactive oxygen intermediates underscoring the importance of these functions for neutrophil  
73 antibacterial activity and the resolution of UTI(25).

74  
75 Another neutrophil antimicrobial mechanism, first described in 2004, is NETosis – the process of  
76 forming neutrophil extracellular traps (NETs)(26). NETosis is a form of cell death resulting in

77 expulsion of a scaffold of decondensed chromatin studded with antimicrobial products such as  
78 myeloperoxidase (MPO), cathelicidin, and histones, that trap various extracellular pathogens to  
79 aid in infection control (26, 27). Multiple stimuli can trigger NETosis including phorbol-myristate  
80 acetate (PMA, a protein kinase C activator), lipopolysaccharide (LPS), calcium ionophores,  
81 hydrogen peroxide, and various microbes, including Gram-positive and Gram-negative bacteria,  
82 as well as fungal species(28). Distinct subtypes of NETosis, discriminated based on cellular  
83 morphology and signaling pathways, include classical (or suicidal) NETosis(29, 30),  
84 mitochondrial NETosis, where NETs are formed from mitochondrial DNA(31), and nonclassical  
85 (or vital) NETosis, where the neutrophil expels nuclear DNA without or prior to lysing(32, 33).  
86 While recent studies have reported the presence of NET-associated products (e.g. DNA,  
87 histones, MPO) in the urine of patients with UTIs(34, 35) and have demonstrated NET formation  
88 in UTI using a bladder-on-a-chip model(36), the role of NETosis in UTI susceptibility and  
89 clearance remains to be established.

90

91 We hypothesized that urinary specific factors may influence the formation of NETs in UTI.  
92 Tamm-Horsfall protein (THP), the most abundant urinary protein, is a highly conserved  
93 glycoprotein with multiple important roles in urinary tract health including the regulation of salt  
94 and water homeostasis and the prevention of mineral crystallization(37, 38). In the context of  
95 UTI, THP is a key host defense factor. Elimination of THP increases UTI susceptibility in murine  
96 models(39-42). THP directly binds urinary pathogens(42-46), inhibiting microbial adherence to  
97 host urothelium, which in turn aids clearance via urinary excretion. THP also shapes host  
98 responses to UPEC by modulating immune cell activity in a cell type and context-dependent  
99 manner(47-49). We previously showed that THP terminal sialic acids engage Siglec-9, an  
100 inhibitory neutrophil receptor, to suppress neutrophil activities including chemotaxis, ROS  
101 release, and bactericidal capacity(50). This immunosuppressive impact of THP is revealed in  
102 THP KO mice, which exhibit elevated circulating pro-inflammatory cytokines, increased kidney

103 inflammation during renal injury, and neutrophilia in the blood and urine with or without  
104 inflammatory stimuli(50-53). However, the modulation of host immune responses by THP in the  
105 context of UTI has not been reported.

106

107 Given the protective roles of both THP and neutrophils in UTI, and considering THP influence  
108 on neutrophil responses, we hypothesized that THP may provide additional host protection by  
109 modulating NETosis. To investigate this hypothesis, we evaluated neutrophil recruitment and  
110 NETosis in a murine UTI model comparing wildtype to THP-deficient mice. Our findings  
111 revealed increased bladder neutrophil recruitment in THP-deficient mice, but reduced NET  
112 formation compared to wildtype mice. Subsequent validation through flow cytometry of human  
113 neutrophils confirmed that THP enhancement of NETosis was dependent on neutrophil  
114 activation and reactive oxygen species. In conjunction with its roles in impeding pathogen  
115 adherence and tempering excessive inflammation, we conclude that THP provides added host  
116 protection by modulating NETosis during UTI.

117

## 118 **RESULTS**

### 119 **THP deficiency increases urinary tract UPEC burdens and tissue histopathology**

120 Prior studies have identified the heightened susceptibility of THP-deficient mice to elevated  
121 UPEC burdens in the urine and bladder at 24 hours post-infection(39, 40). To assess the  
122 sustained impact of THP deficiency during acute UTI, we used an established model of UPEC  
123 UTI(54) in THP<sup>+/+</sup> (WT) and THP<sup>-/-</sup> (KO) mice(50). In this model, mice receive  $1 \times 10^8$  CFU of  
124 UPEC cystitis strain UTI89 or are mock-infected as a control. Consistent with previous  
125 findings(39, 40), THP KO mice exhibited persistent increased bacteriuria (**Fig. 1A**), and  
126 temporarily elevated bacterial load in the bladder and kidney throughout the infection course  
127 (**Fig. 1B-C**) compared to WT mice. Bladder and kidney tissue sections collected during acute  
128 infection were examined by a blinded veterinary pathologist and scored on a 0-4 scale,

129 considering pathologic features such as intraluminal bacteria, submucosal edema, and  
130 suppurative pyelonephritis. UPEC-infected THP KO mice displayed more severe bladder and  
131 kidney pathology compared to their WT counterparts (**Fig. 1D-E**), marked by increased immune  
132 infiltration of the urinary epithelium and submucosa (**Fig. 1F-G**) and luminal mixed immune cell  
133 aggregation in the renal pelvis (**Fig. 1G**). No differences in histopathology scores were observed  
134 in mock-infected WT and THP KO mice.

135

### 136 **THP deficiency alters bladder neutrophil infiltration and impact of neutrophil depletion** 137 **during UTI**

138 We next evaluated immune cell infiltration in the bladder and kidneys during UTI by flow  
139 cytometry. We surveyed the total immune cell fraction (CD45<sup>+</sup>, P1), as well as neutrophils  
140 (Ly6G<sup>+</sup>), non-myeloid (CD11b<sup>-</sup> CD11c<sup>-</sup>), myeloid (CD11b<sup>+</sup> CD11c<sup>+</sup>, P3), myeloid antigen  
141 presenting cells (APCs, MHC-II), and myeloid non-APC population subsets (gating scheme  
142 provided in **Fig. 2A**). At 3 days post-infection, THP KO mice had significantly higher proportions  
143 of CD45<sup>+</sup> cells in both the bladder and kidneys compared to WT-infected mice, although no  
144 differences were observed in later timepoints or mock controls (**Fig. 2B-C**). Additionally, bladder  
145 neutrophil proportions were elevated in infected THP KO mice compared to WT mice at both three  
146 and seven days after UPEC inoculation, with no observed differences in the kidneys (**Fig. 2D-**  
147 **E**). Other bladder immune cell sub-populations did not differ between groups (**Supp. Fig. 1**). In  
148 the kidneys, minimal differences in other sub-populations were noted including a reduced  
149 proportion of myeloid lineages at day 3 and myeloid APCs at day 7 post-inoculation in THP KO  
150 compared to WT mice (**Supp. Fig. 2**). Under mock-infected conditions, THP KO mice exhibited  
151 a slight but significant increase in the proportion of non-APC myeloid cells (**Supp. Fig. 2E**).

152

153 Neutrophil depletion has been previously shown to exacerbate bacterial burdens and promote  
154 chronic infection depending on the extent of neutrophil reduction(17). To evaluate the impact of

155 neutrophil depletion in THP-deficient mice, mice were administered anti-Ly6G antibody or  
156 isotype IgG control intraperitoneally (i.p.) at a dose of 10 µg every 48 h, from day 0 thru day 6  
157 post-inoculation. On day 6, urine sediment was scored for the presence of polymorphonuclear  
158 (PMN) cells on a scale of 0 (<1 PMN per high-powered field) to 5 (>40 PMN) as described  
159 previously(17). Urine and tissues were collected on day 7 post-inoculation to quantify bacterial  
160 burdens. Anti-Ly6G antibody treatment significantly reduced urine sediment PMN scores in WT  
161 mice but had no such effect in THP KO mice (**Fig. 2F**). Additionally, anti-Ly6G antibody  
162 treatment resulted in increased urine and tissue bacterial burdens in WT mice (**Fig. 2G-I**). In  
163 contrast, anti-Ly6G antibody treatment led to decreased bladder CFU in THP KO mice, with no  
164 differences observed in urine or kidney burdens.

165  
166 THP KO mice display heightened inflammation in response to acute kidney injury(52) and show  
167 elevated immune cell recruitment during acute UTI (**Fig. 2B-C**). Given that deficiency in  
168 cyclooxygenase 2 (COX-2), a critical enzyme initiating inflammatory cascades, downregulates  
169 THP expression in the kidneys, and COX-2<sup>-/-</sup> mice are hyper-susceptible to UTI(55), we  
170 examined the impact of COX-2 in our model. Mice were treated with diclofenac, a COX-2  
171 inhibitor(56), provided at 0.2mg/mL in drinking water from day 0 thru day 6 post-inoculation, with  
172 tissues collected at day 7. We found no differences in bladder or kidney burdens between  
173 diclofenac-treated and mock-treated WT and THP KO mice (**Supp. Fig. S3**). Together, these  
174 findings highlight that elevated neutrophils are a distinctive feature of THP deficiency in UTI  
175 which, paired with enhanced bacterial burdens, suggest impaired neutrophil activity in THP KO  
176 mice.

177  
178 **Murine urinary THP levels and glycosylation patterns change minimally during UTI**

179 While genetic and clinical studies have linked *UMOD* variants(57) or reduced THP  
180 production(58, 59) with enhanced risk for UTI; no differences in urinary THP levels were

181 observed between a pediatric UTI cohort and healthy controls(60). Similarly, we observed no  
182 variations in urinary THP levels between mock-infected and UPEC-infected WT mice at days 2-  
183 4 post-inoculation (**Fig. 3A**). To delineate the N-glycan profile of murine THP and assess the  
184 impact of UTI on THP glycosylation, we collected urine over the first 72 h post-inoculation or  
185 mock-treatment and profiled THP glycosylation patterns using MALDI-TOF/TOF mass  
186 spectrometry of procainamide-labeled permethylated N-glycans. Similar to human THP(61-63),  
187 murine THP contained multiple bi-, tri-, and tetra-antennary sialylated and/or fucosylated  
188 complex type N-glycans (**Fig. 3B**). The highest intensity peak (m/z 4588) represented a tetra-  
189 antennary, tetra-sialylated and fucosylated N-glycan (**Fig. 3B, Supp. Table 1**) which matches  
190 the most abundant N-glycan reported on human THP(61, 62). Other high intensity peaks were  
191 observed at m/z 2967, 3777, and 4226. In UPEC-infected THP samples, the four most abundant  
192 structures (m/z 2967, 3777, 4226, and 4588) remained the same, albeit with some proportional  
193 differences: the m/z 2967 peak, corresponding to a bi-antennary, bi-sialylated and fucosylated  
194 N-glycan, increased and the m/z 4588 peak decreased relative to mock-treated spectra (**Fig.**  
195 **3C, Supp. Table 1**). We quantified the total sialic acid released from purified murine THP by  
196 DMB-HPLC analysis. N-glycolylneuraminic acid (Neu5Gc) and N-Acetylneuraminic acid  
197 (Neu5Ac) were distinguished by retention times of 4.2 and 5.3 minutes respectively. No  
198 differences in Neu5Gc, Neu5Ac, or total sialic acid levels were observed between mock-infected  
199 and UPEC-infected samples (**Table 1**). As a control, samples from THP KO mice showed  
200 significantly reduced Neu5Ac and total sialic acid compared to WT mock samples validating that  
201 THP was the primary source of sialic acid in these analyses (**Table 1**). Together, these data  
202 reveal conserved glycosylation patterns, including sialylation by Neu5Ac, in murine and human  
203 THP, which are retained during UTI in a mouse model.

204

205 **Murine neutrophils undergo NETosis during UTI and THP deficiency alters neutrophil**  
206 **sub-populations**



207 To investigate whether differences in neutrophil abundance (**Fig. 2**) corresponded with  
208 differences in neutrophil function, we quantified and visualized NETosis in mouse urine. Nucleic  
209 acid dyes including cell-permeable Hoechst 33342 or DAPI and non-cell permeable Sytox dyes  
210 have been used to distinguish NETosis from other forms of cell death, including apoptosis, in  
211 both human and murine neutrophils in mixed-cell populations(64-66). Additionally, plasma  
212 membrane permeability can be confirmed using a live/dead amine-reactive dye that can only  
213 fluorescently label intracellular amines if the plasma membrane has been compromised(67). In  
214 classical (or suicidal) NETosis, neutrophils permeabilize and expel decondensed chromatin  
215 whereas during nonclassical (or vital) NETosis, neutrophils also release DNA but still retain  
216 viability and effector functions(68, 69). We collected mouse urine from UPEC-infected or mock-  
217 treated mice 24 h post-inoculation, and cells were stained and subjected to flow cytometry.  
218 Neutrophils (PMNs) were identified as CD11b<sup>+</sup> Ly6G<sup>+</sup> and were further gated based on staining  
219 for presence of extracellular DNA (Sytox Orange, SO) as an indicator of NETosis, and plasma  
220 membrane permeability (Live/Dead stain) as depicted in **Fig. 4A**. We identified four unique  
221 populations: live PMNs (SO<sup>-</sup> Live/Dead<sup>-</sup>, Q4), dead PMNs (SO<sup>-</sup> Live/Dead<sup>+</sup>, Q3), classical  
222 NETosis (SO<sup>+</sup> Live/Dead<sup>+</sup>), and nonclassical NETosis (SO<sup>+</sup> Live/Dead<sup>-</sup>, Q1). WT mice displayed  
223 an increase in total urinary neutrophils during infection compared to mock-infected counter parts  
224 (**Fig. 4B**). In both WT and THP KO mice, frequency of live PMNs was reduced during infection  
225 (**Fig. 4C**), but no significant differences were observed in dead PMNs (**Fig. 4D**). UPEC infection  
226 elevated total NETosis (Q1 + Q2) and classical NETosis (Q2) frequency in both WT and THP  
227 KO mice compared to their mock-infected counterparts (**Fig. 4E-F**). Uniquely, WT mice showed  
228 elevated frequency (**Fig. 4C**) and counts (**Fig. 4D**) of nonclassical NETosis in response to  
229 UPEC infection, and compared to UPEC-infected THP KO mice, suggesting that THP promotes  
230 nonclassical NETosis during UTI. The presence of NETs in WT and THP KO urine samples at  
231 24 h post-infection was visualized by immunofluorescence microscopy using antibodies for

232 neutrophils (myeloperoxidase, MPO), NETosis (citrullinated histone H3, H3Cit), and THP (**Fig.**  
233 **4I-J**).

234

### 235 **THP enhances NETosis in human neutrophils with minimal impacts on cellular proteins**

236 To determine if THP impact on NETosis extended to human models, we measured *in vitro*  
237 NETosis formation in primary human neutrophils with and without THP exposure. Peripheral  
238 circulating human neutrophils were isolated and incubated with THP purified from healthy  
239 human urine for 30 min at physiologic concentrations (50 µg/mL). After 2.5 h of stimulation with  
240 PMA, NETosis was measured by detection of fluorescently-labelled extracellular DNA as  
241 described previously(20). THP pretreatment increased levels of NETosis in PMA-stimulated  
242 cells but did not alter NETosis in unstimulated cells (**Fig. 5A**). To identify cellular processes  
243 impacted by the presence of THP, we performed tandem mass tag (TMT)-based quantitative  
244 proteomics of neutrophil cell pellets ( $n = 4$  donors) under these same four conditions: mock-  
245 treated unstimulated (UnTx), THP-treated (THP), PMA-stimulated (PMA), and PMA-stimulated +  
246 THP-treated (PMA+THP). PMA stimulation was the primary driver of variation between samples  
247 as shown by PCA plot (**Fig. 5B**) and resulted in depleted neutrophil granule and NETs-related  
248 proteins likely due to the release of these proteins from activated cells during the 2.5 h  
249 incubation (**Supp. Fig. 4A-B**). Eight shared proteins were increased in THP (unstimulated) and  
250 PMA+THP (stimulated) groups compared to their mock-treated counterparts (**Fig. 5C, Supp.**  
251 **Table 2**). These proteins included THP itself (UMOD), and other known urinary proteins likely  
252 present in the purified THP preparation: apolipoprotein D, protein AMBP, kininogen, and  
253 galectin 3 binding protein (LGALS3BP)(70). The remaining three shared proteins were related to  
254 cellular metabolism (ACSS2, SLC16A9) and immune signaling (IL2RG). In unstimulated cells,  
255 10 additional proteins (7 up and 3 down) were differentially abundant between THP-treated and  
256 mock-treated conditions (**Fig. 5D, Supp. Table 2**) and included several related to translational  
257 regulation and protein turnover (EIF2AK4, POLR3F, UBAC1), second messenger signaling

258 (CD38), cytokine receptor signaling (RNF41), mitochondrial metabolism (GLDC, ALDH5A1),  
259 and phagosome acidification and fusion (RAB20), and chromatin remodeling (BICRAL). Gene  
260 ontology analyses identified mitochondrial respiratory chain complexes as significantly enriched  
261 in THP-treated conditions (**Fig. 5E**). In PMA-stimulated cells, 16 unique proteins (13 up and 3  
262 down) were differentially abundant between THP-treated and mock-treated conditions (**Fig. 5F**,  
263 **Supp. Table 2**). These included proteins involved in second messenger and cell signaling  
264 (PDE7A, FCSK), transcriptional and translational regulatory proteins (PUM1, E2F3, ZFP36L2,  
265 GTPBP6, CCDC86), complement-related and immune related proteins (CD59, CXCL8, C4BPA,  
266 CTSW), intracellular trafficking and cytoskeleton arrangement (GIPC2, NCOA4, XIRP2), and  
267 DNA/chromatin remodeling proteins (DNASE1L1, BOD1). Gene ontology analyses identified  
268 tertiary granule and primary lysosome pathways as significantly enriched in THP-treated  
269 conditions and nonsignificant enrichment of chromosome condensation, autophagosome, and  
270 cytoskeleton pathways (**Fig. 5G**). Together, this proteomic profiling suggests THP induces  
271 subtle differential responses related to mitochondrial metabolism in the absence of PMA  
272 stimulation and impacts multiple nuclear, organelle, and cytoskeletal functions in stimulated  
273 conditions.

274

### 275 **THP increases NETosis in human neutrophils in a ROS-dependent manner**

276 To determine whether human neutrophil NETosis populations were similarly affected by THP as  
277 seen with murine neutrophils (**Fig. 4**), we modified our flow cytometry strategy for human  
278 neutrophils. Isolated peripheral human neutrophils were treated with purified human THP for 30  
279 min and stimulated with PMA for 2.5 h as described above before staining and analysis via flow  
280 cytometry. Single cells were gated for the presence of extracellular/surface neutrophil granule  
281 content (MPO) and extracellular DNA (Sytox Orange) to identify double positive cells  
282 undergoing NETosis (MPO<sup>+</sup>SO<sup>+</sup>, P3) (**Fig. 6A**). P3 cells were further separated based on  
283 Hoechst brightness and Live/Dead staining into nonclassical NETosis (Hoechst<sup>lo</sup> Live/Dead<sup>-</sup>,

284 P4) and classical NETosis (Hoechst<sup>hi</sup> Live/Dead<sup>+</sup>, P5) subsets (**Fig. 6A**). Consistent with the  
285 fluorescence-based NETosis assay (**Fig. 5A**), THP treatment significantly increased total  
286 NETosis in PMA-stimulated conditions, but not in the unstimulated cells (**Fig. 6B**). Furthermore,  
287 THP treatment enhanced both nonclassical (**Fig. 6C**) and classical NETosis (**Fig. 6D**) subsets  
288 specifically in PMA-stimulated conditions. Classical and nonclassical NETosis are dependent on  
289 NADPH oxidase 2-mediated production of reactive oxygen species(31, 71, 72) and hydrogen  
290 peroxide (H<sub>2</sub>O<sub>2</sub>) as an exogenous source of ROS is sufficient to stimulate NETosis *in vitro*(28).  
291 To examine the importance of ROS on THP-mediated effects of NETosis, we compared  
292 nonclassical and classical NETosis subsets in the presence of PMA, H<sub>2</sub>O<sub>2</sub>, or PMA and a  
293 NADPH oxidase inhibitor diphenyleneiodonium (DPI). The THP-mediated increase in  
294 nonclassical NETosis occurred in the presence of both PMA and H<sub>2</sub>O<sub>2</sub> but was abrogated with  
295 the addition of DPI (**Fig. 6E**). In contrast, no significant differences were observed in classical  
296 NETosis subsets under these same conditions (**Fig. 6F**). Together, these data suggest that  
297 THP-mediated effects are in part dependent on ROS, specifically in cells undergoing  
298 nonclassical NETosis.

299

### 300 **THP alters cell shape and chromatin staining during NETosis as measured by imaging** 301 **flow cytometry**

302 Prior to DNA release, cells destined for NETosis undergo multiple cellular remodeling events  
303 including cytoskeletal and endoplasmic reticulum disassembly(73), vacuolization, autophagy,  
304 and superoxide production(74), and lastly, chromatin swelling and nuclear envelope rupture(75).  
305 Live cell imaging or imaging flow cytometry techniques combined with mathematical modeling  
306 and/or machine learning have revealed predictable morphologic changes that can delineate  
307 NETosis from other forms of cell activation and death(32, 64, 73, 76, 77). To assess whether  
308 THP altered neutrophil morphology during NETosis, we adapted an imaging flow cytometry  
309 method and algorithm from prior work(76) to identify NETs, NET precursors, and other forms of

310 cell death. Using this method, cells can be distinguished into six cell types: healthy (Type I), live  
311 cell decondensed nuclei (Type II), NETs (Type III), DNA fragments (Type IV), dead cell  
312 condensed nuclei (Type V), and dead cell diffuse nuclei (Type VI). Peripheral human neutrophils  
313 were pretreated with THP or an estimated equivalent amount of sialic acid (Sia, 500 ng/mL) and  
314 stimulated with PMA for 2.5 hours. Cells were stained with  $\alpha$ -MPO-FITC, Sytox Orange,  
315 Hoechst 33342, and Live/Dead Near I/R, subjected to imaging flow cytometry, and gated as  
316 shown in **Fig. 7A**. Cells were separated from debris based on brightfield (BF) area and  
317 Hoechst<sup>+</sup> staining. NETs (Type III) and DNA NET fragments (Type IV) were distinguished by  
318 higher extracellular DNA (calculated by the SO staining beyond the BF margins of the cell) area  
319 and higher or lower Hoechst intensity respectively. The remaining cells were further gated to  
320 collect focused, single cell images and separated based on SO intensity (indicating membrane  
321 permeability) and Hoechst area (indicating nuclear area). Dead cells with condensed nuclei  
322 (Type V) and dead cells with diffuse nuclei (Type VI) were marked by higher SO intensity and  
323 delineated by lower and higher Hoechst area respectively. Healthy cells (Type I) and live cells  
324 with decondense nuclei were demarcated by Hoechst area. Representative images of each cell  
325 type are shown in **Fig. 7B** with dead cell types (V and VI) confirmed by staining Live/Dead<sup>+</sup>  
326 while all other types were Live/Dead<sup>-</sup>. No differences in Hoechst<sup>+</sup> populations were observed  
327 across groups (**Supp. Fig. 5A**). Although individually, NETs and NET fragment frequencies did  
328 not differ between groups (**Supp. Fig. 5B-C**), the sum of NETs and NET fragment frequencies  
329 were significantly higher in the PMA + THP group compared to mock-treated controls (**Fig. 7C**).  
330 Additionally, the PMA + THP group exhibited higher frequencies of Type II (**Fig. 7D**) and  
331 decreased Type V frequencies (**Fig. 7E**) compared to mock-treated controls. Other subsets  
332 (Type VI and Type I) were not significantly different between groups (**Fig. 7F-G**). Using the  
333 Feature Finder Analysis tool in the IDEAS 6.3 software, we also identified the circularity feature,  
334 which gives higher scores to features closely resembling a circle, as significantly higher in both  
335 PMA + THP and PMA + Sia groups compared to mock-treated controls (**Supp. Fig. 5D**).

336 Overall, these analyses reveal that THP, in the presence of a NETosis stimuli, enhances the  
337 frequency of NETs (Type III), NETs fragments (Type IV), and NETs precursors (Type II) over  
338 baseline conditions.

339

## 340 **DISCUSSION**

341 Despite abundant evidence supporting the critical independent roles of THP and neutrophils in  
342 protecting against UTI, few studies have investigated direct interactions between these two host  
343 defenses. In this work, we build upon recent findings of THP regulation of neutrophil function  
344 and provide a more detailed characterization of the histopathological and immunological  
345 consequences of THP deficiency in the urinary tract during UTI. From our *in vivo* experiments,  
346 neutrophils emerged as a key cell type; THP-deficient mice displayed altered neutrophil  
347 proportions and NETosis during UTI, combined with improved bacterial control upon neutrophil  
348 depletion. In prior work, we demonstrated that THP's terminal sialic acids binding neutrophil  
349 Siglec-9, inhibiting ROS production among other regulatory effects(50). Presently, employing  
350 multiple methods including imaging flow cytometry, we show that in the presence of NETosis  
351 stimuli, THP enhances characteristics associated with NETosis such as nuclear  
352 decondensation. We propose that this function, coupled with THP-mediated dampening of  
353 excessive neutrophil activation(50), is integral to protecting the urinary tract from infectious and  
354 inflammatory insults.

355

356 Since their initial reports in 2004(39, 40), two independent transgenic THP KO mouse lines have  
357 consistently demonstrated that THP deficiency increases susceptibility to urinary pathogens(39-  
358 42, 78) and aggravates renal pathologies(37, 79, 80). Although histologically similar at baseline,  
359 THP KO mice display more severe renal necrosis and neutrophil infiltration upon acute kidney  
360 injury(52). Additionally, they show increased bladder lamina propria thickness and neutrophil  
361 invasion of the uroepithelium during *Klebsiella pneumoniae* or *Staphylococcus saprophyticus*

362 UTI(78). Our findings build upon these prior studies, revealing that THP KO mice exhibit more  
363 severe histopathological alterations in both bladder and renal tissues during acute UPEC UTI.  
364  
365 In both THP KO lines, increased neutrophil recruitment to affected tissues is a primary  
366 phenotype during urinary tract injury or exposure to inflammatory stimuli(50, 79). Likewise, in  
367 this study we identified neutrophils as the predominant immune cell population impacted by THP  
368 deficiency. In contrast to a prior study using the other THP KO transgenic line(53), we did not  
369 observe elevated renal neutrophils in our THP KO mice at baseline; this divergent phenotype  
370 may be due to differences between *Neo* cassette placement between the two independent THP  
371 KO transgenic lines or variations in the methods used to evaluate neutrophil populations. The  
372 heightened tissue damage in THP KO mice may, in part, be driven by excessive neutrophil  
373 activation as blocking neutrophil recruitment through chemokine depletion ameliorates tissue  
374 damage in THP KO mice(79). While neutrophil depletion worsened bacterial burdens in the  
375 bladders of WT mice, their depletion in THP KO mice resulted in reduced bladder burdens. This  
376 highlights the importance of neutrophils in both bacterial killing and tissue damage and is  
377 supported by a prior study demonstrating that high levels of neutrophil depletion (200  $\mu\text{g}/\text{dose}$ )  
378 worsened bacterial burdens and promoted chronic infection, while partial neutrophil depletion  
379 (10  $\mu\text{g}/\text{dose}$ ) lessened the incidence of chronic infection(17).  
380  
381 Human THP possesses eight N-glycosylation sites with high-mannose and bi-, tri-, or tetra-  
382 antennary complex types(46) and these glycans are crucial to THP structure and function. THP  
383 glycosylation facilitates direct interactions with both neutrophils and *E. coli*(43, 50). Altered N-  
384 glycan profiles, including reduced galactose and  $\alpha 2-6$ -linked sialic acid, have been reported in  
385 UTI patients compared to healthy controls(81). To our knowledge, this work represents the first  
386 report of N-glycosylation patterns on murine THP. Despite being only 70% identical at the amino  
387 acid sequence level, mouse THP possesses the same N-glycan sites as human THP(82), and



388 here we show that the glycan structures themselves are also similar including the shared,  
389 abundant tetra-antennary, tetra-sialylated and fucosylated N-glycan. Reduced sialic acid levels  
390 have been reported in THP from patients with UTI, interstitial cystitis, and kidney stones(61, 62,  
391 81); however, we did not observe any changes in THP total sialic acid levels during murine UTI.  
392 Due to low urine volumes, we pooled from multiple mice and collected over the first 72 hours  
393 following infection. Thus, it is possible that reduction in sialic acid occurs at later periods during  
394 UTI. Additionally, we determined that the primary sialic acid modification on murine THP is  
395 Neu5Ac rather than Neu5Gc, a common mammalian sialic acid not present in humans(83).  
396 Together, these data demonstrate that THP sialic acid-neutrophil Siglec signaling remains intact  
397 during UTI and further highlight the utility of mouse models in studying mechanistic functions of  
398 THP glycans in the urinary tract.

399

400 This study provides the first visualization of NETs during murine UTI (**Fig. 4**), complementing  
401 several *in vivo* studies that provide evidence of the importance of NETosis in UTI. Both *Irf3*<sup>-/-</sup>  
402 and *Ifnβ*<sup>-/-</sup> mice present with abscess formation and tissue damage during UTI indicating  
403 defective neutrophil responses(84). This may involve reduced NET formation as the type I IFN  
404 response(85), and specifically IFN-β(86), drive NETosis in mouse models of lung infection. A  
405 recent study using protein-arginine deiminase type 4 (PAD4) KO mice as a model for reduced  
406 NETosis formation found that PAD4 KO mice displayed higher bladder and kidney bacterial  
407 burdens in UPEC UTI(87). Proteomic studies of urine from UTI patients have identified NET-  
408 associated proteins in samples from bacterial and fungal infections, suggesting that NETosis  
409 may be a conserved host urinary defense against a wide range of uropathogens(34).

410 Additionally, neutrophil NETosis in response to UPEC UTI was demonstrated on a bladder-on-  
411 a-chip model using diluted human urine as the luminal medium; thus, THP would be present in  
412 this system(36). These *in vitro* studies did not distinguish subtypes of NETosis and did not  
413 associate NET formation with outcomes. However, future work using these or similar platforms



414 could determine the contribution of THP to neutrophil migration, NETosis, and resolution of  
415 infection in a dynamic model of the uroepithelium.

416

417 In this study, we used proteomics to parse the signaling pathways impacted by THP treatment  
418 in the presence and absence of PMA stimulation. Our findings were generally in line with other  
419 proteomic-based studies of PMA-induced NETs in human(88) and mouse(89) neutrophils, with  
420 some overlap in cellular responses to platelet-activating factor, another stimulus of NETosis(90).  
421 PMA stimulation resulted in organelle and cytoskeleton-related proteins which may reflect  
422 cytoplasmic changes occurring prior to NETosis(73, 75) or during the early, active stages of  
423 NETosis(75). In this study, we found that THP itself minimally altered protein profiles, with  
424 modest increases in tertiary granule and primary lysosome pathways in the presence of PMA.  
425 Neutrophil retention of granules is thought to contribute to membrane breakdown during  
426 NETosis(91), and autophagy is required for intracellular chromatin decondensation(74),  
427 suggesting multiple effects of THP exposure. However, there are several limitations impacting  
428 the interpretation of this data set. It is possible that measuring changes in relative abundances  
429 of protein levels is not the most suitable method to evaluate NETosis induction. Protein  
430 translation is dispensable for NOX-dependent or NOX-independent NETosis although  
431 transcriptional changes are observed as soon as 30 minutes post-exposure to stimuli(92).  
432 Another limitation of our approach is that we evaluated proteomics of cell pellets that remained  
433 after 2.5 h of stimulation, thus observing lower levels of key markers of NETosis and neutrophil  
434 degranulation that were released from activated and/or lysed cells. Additionally, since only one  
435 time point was evaluated, differences in protein kinetics were not captured. Even so, by  
436 comparing PMA-stimulated cells in the presence or absence of THP, we identified multiple  
437 differentially abundant proteins linked to cytoplasmic and chromatin remodeling and these  
438 candidates are the focus of future studies.

439

440 Both the classical (suicidal) and mitochondrial types of NETosis are dependent on NADPH  
441 oxidase 2 (NOX2) activity(31, 71, 72, 93). Neutrophils deficient in NADPH oxidase fail to induce  
442 actin and tubulin polymerization and NET formation upon stimulation(94). Nonclassical (vital)  
443 NETosis, where the cell membrane initially remains intact, may be NOX-independent at early  
444 time points (< 1h) but becomes NOX-dependent at later time points(33). Nonclassical NETosis  
445 is characterized by more extensive histone citrullination, delayed ROS release, dilatation of the  
446 nuclear envelope prior to rupture, and the presence of extracellular DNA NETs despite having  
447 intact plasma membranes(33, 95). We observed that THP enhanced nonclassical NETosis, and  
448 to a lesser extent, classical forms, in a manner dependent on ROS *in vitro* (**Fig. 6**). Additionally,  
449 a reduced frequency of apoptotic cells was observed in PMA-stimulated THP-treated  
450 neutrophils (**Fig. 7**). In prior work, Siglec 9 crosslinking reduced apoptosis, but promoted non-  
451 apoptotic cell death, in GM-CSF-stimulated neutrophils in a ROS-dependent manner(96). It is  
452 interesting to speculate that THP, through Siglec-9 mediated inhibition of apoptosis, may allow  
453 more opportunity for stimulated cells to undergo NETosis. This would also explain the observed  
454 increased proportion of cells with dilated nuclear envelopes and decondensed chromatin in the  
455 presence of intact plasma membranes. A limitation of these *in vitro* assays is that they were not  
456 performed in the context of human urine or infection; thus, cellular activation may differ.  
457 Nonetheless, we still observed similarities in THP-associated increases in nonclassical NETosis  
458 in both mouse UTI and human neutrophils *in vitro* using parallel methodologies.

459  
460 Imaging flow cytometry has been used in various studies to categorize NETosis. In one study,  
461 the categorization of 'suicidal' and 'vital' NETosis based on neutrophil morphology in response  
462 to LPS stimulation(97). In this work, Zhao *et al* observed populations with diffuse MPO and  
463 nuclear (Hoechst) staining, indicating decondensed nuclei, which they termed suicidal NETosis,  
464 and another population that were elongated with large blebs at one pole and nuclear and  
465 granular contents at the other pole, which they termed vital NETosis, hypothesizing that the

466 nuclear material was being extruded leaving anuclear cells with intact membranes behind.  
467 However, we did not observe this morphology in our assays, possibly due to differences in time  
468 course (1 h vs. 2.5 h) and stimuli (LPS vs. PMA). Interestingly, they also described both suicidal  
469 and vital NETosis occurring after 4 h of PMA stimulation using the same morphologic  
470 characterization(97). Another study used nuclear morphology (normal or decondensed) and  
471 histone H4 citrullination to assess NETosis in response to hemin, PMA, LPS, and IL-8 over a 1  
472 h treatment period(77). To differentiate between NETosis and other forms of cell death, another  
473 study used a combination of cell permeable and non-permeable nucleic acid dyes and cell  
474 boundaries defined by bright field images(76). We adapted this method to our samples and  
475 found striking similarities in cell morphologies with the prior work(76) even with differences in  
476 staining (e.g. MPO vs. NE, Sytox Orange vs. Sytox Green, inclusion of Live/Dead viability dye).  
477 Observed differences in cell type frequencies were likely different due to differences in  
478 experimental methods (e.g. we did not use Percoll). Our results further validate this  
479 methodology as a robust pipeline for rapidly distinguishing NETs from other forms of cell death  
480 and we recommend the addition of a Live/Dead stain to this pipeline to confirm cell membrane  
481 permeability. It is possible additional cell types could be distinguished from this data set: for  
482 instance, while some cells undergoing NETosis stained with MPO indicating degranulation,  
483 others did not (**Supp. Fig. 5E**). We found that sialic acid alone did not alter cell morphologies to  
484 the extent that THP did in PMA-stimulated cells with the exception of increased cell circularity.  
485 This suggests that endogenous proteins such as THP may differentially signal through Siglec-9  
486 compared to free sialic acid or pathogen-mediated engagement of Siglec-9(98, 99) to alter  
487 NETosis.

488

489 In summary, our study reveals that THP modulates neutrophil NETosis in both animal models  
490 and human neutrophils *in vitro*. We postulate that this activity provides an additional layer of  
491 THP-mediated protection against UTI. Acting as a multi-faceted host defense through both

492 blocking pathogen adherence and modulating immune cell function, pharmacologic  
493 manipulation of THP(100, 101) may emerge as a promising therapeutic target to improve  
494 outcomes and prevent UTI in susceptible populations.

495

## 496 **METHODS**

### 497 Sex as a biological variable

498 This study exclusively examined female mice. It is unknown whether the findings are relevant  
499 for male mice. Both male and female human donors were included; however, due to small  
500 sample sizes, we are underpowered to determine sex-dimorphic effects in this study.

501

### 502 Bacterial strains and growth conditions

503 Wildtype uropathogenic *E. coli* strain UTI89(102) was grown overnight at 37°C in Luria-Bertani  
504 (LB) broth with shaking. Stationary phase overnight cultures were then centrifuged for 5 minutes  
505 at 3,200 × *g* and resuspended in an equivalent volume of PBS.

506

### 507 Murine model of UPEC urinary tract infection

508 Wild type (WT) THP<sup>+/+</sup> and THP<sup>-/-</sup> (THP KO) mice(39) were bred and maintained at UCSD and  
509 BCM. Groups were randomly assigned and mice were housed 4-5 animals per cage. Mice ate  
510 and drank ad libitum. All animals used in this study were females aged 2 to 5 months.

511

512 UPEC strain UTI89 was prepared as described above. Mice were anesthetized with inhaled  
513 isoflurane and infected via transurethral inoculation with approximately 10<sup>8</sup> CFU in 50 µl of PBS  
514 as described previously(54). Twenty-four hours to ten days post-infection, mouse urine was  
515 expressed and/or bladders and kidneys were collected. Tissues were homogenized in tubes  
516 containing 1.0-mm-diameter beads (Biospec Products; catalog number 11079110z) using a  
517 MagNA Lyser instrument (Roche Diagnostics). Serial dilutions of homogenized organs were

518 plated on LB agar and enumerated the following day. Urine samples were either plated for CFU  
519 on LB agar or processed for flow cytometry or microscopy as described below. For partial  
520 neutrophil depletion, mice were administered 10 µg of anti-Ly6G (clone 1A8, catalog no.  
521 BE0075-1; BioXCell) or rat IgG2a isotype control (clone 2A3, catalog no. BE0089; BioXCell) in  
522 100 µL of sterile PBS i.p. just prior to bacterial inoculation. Mice received additional antibody  
523 injections on day 2 and 4 post-inoculation. For diclofenac treatment, mice were administered  
524 diclofenac sodium salt (Thermo Scientific Chemicals) at a targeted 30 mg/kg/day dose as  
525 described previously(56). To achieve this dosage, we determined that the average mouse  
526 weighed 20 g and consumed 3 mL of water daily thus mice were given diclofenac sodium salt  
527 (0.2mg/mL) in drinking water on days 0 through 6 post-inoculation.

528

#### 529 Tissue pathology assessment and scoring

530 Bladder and kidney tissues were collected at day 1 and 3 post-inoculation, fixed in 10% neutral  
531 buffered formalin for 24 h, and dehydrated by an ethanol gradient and embedded in paraffin.  
532 Tissue sectioning (4 µm) and hematoxylin and eosin (H&E) staining was performed by the UC  
533 San Diego Comparative Phenotyping Core. Tissue sections were examined by a veterinary  
534 pathologist blinded for treatment (UPEC versus mock-infection) and genetic background (WT or  
535 THP KO). Severity of bladder inflammation was scored based on number of infiltrating cells,  
536 degree of tissue damage, and by the presence or absence of visible bacteria. Scores ranged  
537 from 0 (no lesions) to 4 (severe lesions). Minimal to mild lesions (0-2) consisted of small  
538 numbers of infiltrating inflammatory cells and intraluminal bacteria/debris. Severe lesions (3-4)  
539 involved fibrinoid necrosis of submucosal blood vessels, submucosal edema, and micropustule  
540 formation within the urothelium. Brightfield images were collected using an Echo Revolve  
541 microscope at 400X (bladders) and 200X (kidneys) magnification.

542

#### 543 Flow cytometry of bladder and kidneys

544 Bladder and kidney tissues were subjected to flow cytometry as adapted from prior work(19).  
545 Tissues were finely minced and incubated in RPMI 1640 containing 4 mg/mL collagenase and  
546 50 U/mL DNase for 1 h at 37°C with manual pipetting every 15 min. Samples were passed  
547 through 40-µm filters and washed in RPMI 1640 medium with 10% FBS. Kidney samples were  
548 subjected to RBC lysis by cells in 0.2% (w/v) saline for 30 seconds with gentle mixing and then  
549 stopping lysis by adding an equal volume of 1.6% (w/v) saline. Cells were blocked with 1:200  
550 mouse BD Fc-block (BD Biosciences) for 15 min on ice in PBS with 1 mM EDTA, 1% FBS,  
551 and 0.1% sodium azide. Cells were stained for 30 min on ice using the following antibodies (all  
552 at 5 µg/mL): anti-CD11b-FITC (clone M1/70, catalog no. 553310; BD Biosciences), anti-  
553 CD11c-PerCP-Cy5.5 (clone N418, catalog no. 45-0114-82; eBioscience) or anti-CD11c-BV786  
554 (clone N418, catalog no. 117335; BioLegend), anti-Ly6G-APC (clone 1A8, catalog no. 127614;  
555 BioLegend), anti-MHC-II-APC-Fire750 (clone M5/114.15.2, catalog no. 107652; BioLegend) or  
556 anti-MHC-II-BV650 (clone M5/114.15.2, catalog no. 563415; BD Biosciences), and anti-CD45-  
557 BV510 (clone 30-F11, catalog no. 103138; BioLegend) or anti-CD45-BV605 (clone 30-F11,  
558 catalog no. 563053; BD Pharmingen). Samples were washed 1X, resuspended in fresh FACS  
559 buffer, and run on a BD FACSCanto II (BD Biosciences). Samples were gated on unstained  
560 cells as described in **Fig. 2A** and positive signals were determined using single-stain controls,  
561 and data were analyzed with FlowJo version 10.9.0 (FlowJo LLC).

562

### 563 Urine Sediment Scoring

564 Urine sediment scoring was performed as described previously(17). Mouse urine was diluted  
565 1:10 and centrifuged onto glass slides using a Cytospin 3 (Thermo Shandon) at 1000 rpm for 3  
566 minutes. Slides were covered with Wright-Giemsa stain for 30 seconds, washed twice with  
567 water, and visualize by light microscopy on Olympus BX41 brightfield microscope at 200X  
568 magnification (hpf). The average number of polymorphonuclear (PMN) cells was calculated from  
569 counting 2 independent fields and scored by a semi-quantitative scoring system of 0-5: 0, < 1

570 PMN/hpf; 1, 1–5 PMN/hpf; 2, 6–10 PMN/hpf; 3, 11–20 PMN/hpf, 4, 21–40 PMN/hpf, and 5, > 40  
571 PMN/hpf.

572

### 573 Flow cytometry of murine urine

574 Mouse urine was subject to flow cytometry analyses as described previously(50) with several  
575 modifications. Urine volume was recorded and then passed through a 40- $\mu$ m filter. Cells were  
576 washed in PBS and resuspended in 50  $\mu$ L of FACS buffer (1mM EDTA, 1% FBS, 0.1% sodium  
577 azide in PBS). The following antibodies (0.5  $\mu$ g/mL) and dyes (concentrations provided below)  
578 were added: Anti-CD11b-FITC (clone M1/70, catalog no. 553310; BD Biosciences), anti-Ly6G-  
579 APC (clone 1A8, catalog no. 127614; BioLegend), Live/Dead Near IR (1:200 of stock, catalog  
580 no. L34975; Thermo Fisher Scientific), Sytox orange (100 nM, catalog no. S34861; Thermo  
581 Fisher Scientific), and Hoechst 33342 (200 nM, catalog no. 62249; Thermo Fisher Scientific).  
582 After a 30-minute incubation on ice, samples were washed 1X, resuspended in fresh FACS  
583 buffer, and run on a BD FACSCanto II (BD Biosciences). Samples were gated on unstained  
584 cells as described in **Fig. 4A** and positive signals were determined using single-stain controls,  
585 and data were analyzed with FlowJo version 10.9.0 (FlowJo LLC).

586

### 587 Immunofluorescence of murine urine

588 Mouse urine, collected 24 h post-infection, was diluted 1:20 and centrifuged onto glass slides  
589 using a Cytospin 3 (Thermo Shandon) at 1000 rpm for 5 minutes. Samples were fixed in 1%  
590 paraformaldehyde for 10 min, washed 1X, and permeabilized with 0.1% TritonX at room  
591 temperature. Cells were washed in PBS + 0.01% Tween20 (PBST) and blocked for 1 h in PBST  
592 with 10% horse serum and 1% BSA. Cells were incubated overnight at 4°C with primary  
593 antibodies: sheep anti-THP polyclonal antibody (1:40, catalog no. AF5175; R&D Systems), goat  
594 anti-MPO polyclonal antibody (1:200, catalog no. AF3667; R&D Systems), and rabbit anti-  
595 Histone H3 (citruiline R2 + R8 + R17) polyclonal antibody (1:100, catalog no. ab5103; abcam)



596 diluted in PBST + 1% BSA. The anti-THP antibody was conjugated with FITC using the FITC  
597 Conjugation Kit Lightning-Link (abcam ab102884) kit per manufacturers' instructions. Cells were  
598 washed 2X in PBST and incubated for 1 h at room temperature with secondary antibodies anti-  
599 Goat IgG-AF647 (1:250, catalog no. A-21469; Thermo Fisher Scientific) and anti-rabbit IgG-  
600 Texas Red (1:400, catalog no. ab6800, abcam) to visualize MPO and H3cit respectively, and  
601 nuclei were stained with NucBlue Fixed Cell ReadyProbes Reagent (catalog no. R37606,  
602 Thermo Fisher Scientific). Slides were mounted, cured, and fluorescence images collected  
603 using an Echo Revolve microscope at 600X magnification using filter configurations for DAPI,  
604 FITC, TxRED and CY5.

605

#### 606 Tamm-Horsfall glycoprotein quantification and purification

607 Mouse urine was expressed every 3-4 hours up to 3 times a day for the first 96 hours post-  
608 inoculation from WT and THP KO mice and mock-infected controls. Total THP levels of a subset  
609 of urine samples (diluted 1:10) was determined by ELISA (catalog no. DY5144-05, R&D  
610 Systems) per manufacturers' instructions. WT samples falling below the limit of detection were  
611 excluded from analyses. For murine THP purification, urine was pooled from multiple mice and  
612 time points based on genotype (WT vs. THP KO) and infection status (UPEC-infected vs.  
613 mock). For human THP purification, urine from healthy male and female donors was collected  
614 and stored at 4°C until THP purification. THP was purified via an adapted protocol(62). Briefly,  
615 2.5 g of diatomaceous earth (DE) was combined with Milli-Q water to create a 50 mL slurry. The  
616 DE slurry was passed through a 60 mL Büchner funnel with vacuum filtration to create a DE  
617 layer. The DE layer was washed with 50 mL of Milli-Q water followed by 50 mL of PBS. Urine  
618 (approximately 10 mL) was filtered through the DE layer, followed by 50 mL of PBS, and the DE  
619 layer was dried under vacuum for 2 min. The DE layer was transferred to a 50 mL conical and  
620 THP bound to the layer was solubilized by adding Milli-Q water (50 mL) under gentle rocking for  
621 30 min. Samples were centrifuged at 3220 × g for 30 min and supernatant containing THP was



622 run through an Amicon® Ultra 50 kDa filter at 3220 × *g* for 15 min in multiple batches. Filters  
623 were washed 3X with 15 mL of Milli-Q water. Total protein in retentate was measured using  
624 BCA assay (Pierce, Catalog no. 23225) per manufacturers' instructions, lyophilized, and stored  
625 at -80°. Purity of both mouse and human was confirmed by running purified THP on a 4-12%  
626 Bis-Tris polyacrylamide gel and staining with SimplyBlue™ SafeStain (Thermo Fisher  
627 Scientific). THP was visualized as a single band at ~ 85 kDa (**Supp. Fig. 6**).

628

#### 629 THP glycan analyses

630 For measurement of sialic acid, purified mouse THP samples (25 µg of protein) were hydrolyzed  
631 using 2M acetic acid at 80°C for 3 h to release sialic acids (Neu5Ac and Neu5Gc). Excess acid  
632 was removed via evaporation using a speed vacuum and hydrolyzed sialic acids were then  
633 dissolved in known volume of ultrapure water and tagged with DMB reagent at 50°C for 2.5 h.  
634 Finally, DMB-tagged sialic acids (2 µg dissolved in ultra-pure water) were injected on a Reverse  
635 Phase Ultra Pressure Liquid Chromatography Florescence Detector (RP-UPLC-FL, Waters  
636 Acquity UPLC) set at  $\lambda_{ex}$  373 nm and  $\lambda_{em}$  448 nm on a Acquity UPLC BEH C18 1.7µm, 2.1mm  
637 x 50mm column (Waters, cat. No. 186002350). Solvents included 7% methanol with 0.1% TFA  
638 in HPLC water and acetonitrile with 0.1% TFA and the flow rate was set to 0.4 mL/min. Sialic  
639 acids were quantified by comparing with known amount of standard mixture (Neu5Gc and  
640 Neu5Ac) purchased from Sigma-Aldrich.

641

642 N-linked glycans were enzymatically released from purified mouse THP using PNGase-F kit  
643 (catalog no P0709S, New England Biolabs). N-glycans were then purified from the reaction  
644 mixture containing denaturing buffer and de-N-glycosylated proteins by solid phase extraction  
645 method using Sep-Pak C18 (1 cc Vac-cartridges, Waters) and poly-graphitized charcoal  
646 cartridge (Supelclean Envi-Carb, Supelco). Purified N-glycans were per-methylated and  
647 analyzed by MALDI-Tof/Tof mass spectrometry (Bruker, AutoFlex) in positive mode. Briefly, N-

648 glycans were dried completely and re-dissolved in anhydrous DMSO, followed by per-  
649 methylation using NaOH slurry in anhydrous DMSO and CH<sub>3</sub>I. Per-methylated glycans were  
650 extracted with chloroform, and dried completely using dry nitrogen flush. The permethylated N-  
651 glycans were dissolved in mass spec grade MeOH and mixed in 1:1 (v/v) ratio with Super-DHB  
652 (MALDI matrix) before spotting. Sample (1 μL) were spotted and allowed to air dry before  
653 acquiring mass spectra. All MALDI mass spectral data on permethylated N-glycans were  
654 acquired in positive and reflectron mode. Finally, the mass spectral data was analyzed and  
655 plausible N-glycan structures were annotated using GlycoWork Bench software selecting CFG  
656 database.

657

#### 658 Human neutrophil isolation and NETosis assays

659 Under approval from UC San Diego IRB/HRPP and BCM IRB, venous blood was obtained after  
660 informed consent from healthy adult volunteers, with heparin as an anticoagulant. Neutrophils  
661 were isolated using PolymorphPrep™ (Axis-Shield) to create a density gradient by  
662 centrifugation according to the manufacturer's instructions. Fluorescence-based quantification of  
663 neutrophil extracellular traps (NETs) was performed as described previously(20). Briefly,  
664 isolated neutrophils were plated on 96-well tissue culture plates at  $2 \times 10^5$  cells/well. Cells were  
665 pretreated with 50 μg/mL of purified human THP or mock-treated, and incubated at 37°C in 5%  
666 CO<sub>2</sub> for 30 min, and then incubated for an additional 3 h with phorbol 12-myristate 13-acetate  
667 (PMA, Sigma Aldrich) PMA (25 nM) to induce NET production(20). Micrococcal nuclease was  
668 then added at a final concentration of 500 mU/mL for 10 min to digest extracellular DNA. Plates  
669 were centrifuged at 200 g for 8 min; sample supernatant was then collected and transferred to a  
670 new 96-well plate. DNA was quantified using a Quant-iT PicoGreen® dsDNA Assay Kit from Life  
671 Technologies (Carlsbad, CA, USA), with fluorescence detected on intensity (485 nm excitation  
672 and 530 nm emission) measured by an EnSpire Alpha Multimode Plate Reader (PerkinElmer).

673

674 Human neutrophil proteomics and analyses

675 Peripheral human neutrophils were isolated as above and pretreated with 50 µg/mL of purified  
676 human THP or mock-treated, and incubated at 37°C in 5% CO<sub>2</sub> for 30 min, and then incubated  
677 for an additional 2.5 h with PMA (25 nM). Cells were pelleted by centrifugation at 500 × g for 5  
678 min, washed 1X with PBS, and then pellets were snap frozen and stored at -80°C. Protein  
679 extraction, protein digestion and offline peptide fractionation was performed based on a protocol  
680 adapted from prior work(103). Briefly, cells were lysed in 8M urea buffer, reduced, alkylated,  
681 and digested using LysC and Trypsin proteases. The peptides were labeled with TMTpro 16  
682 plex isobaric label reagent (Thermo Fisher Scientific) according to manufacturer's protocol. The  
683 high-pH offline fractionation was used to generate 24 peptide pools. The deep-fractionated  
684 peptide samples were separated on an online nanoflow Easy-nLC-1200 system (Thermo Fisher  
685 Scientific) and analyzed on Orbitrap Exploris 480 mass spectrometer (Thermo Fisher Scientific).  
686 Each fraction (250 ng) was loaded on a pre-column (2 cm × 100µm I.D.) and separated on in-  
687 line 20 cm × 75 µm I.D. column (Reprosil-Pur Basic C18aq, Dr. Maisch GmbH, Germany)  
688 equilibrated in 0.1% formic acid (FA). Peptide separation was done at a flow rate of 200 nL/min  
689 over 110 min gradient time with different concentration of 90% acetonitrile solvent B (2-30% 87  
690 min, 30-60% 6 min, 60-90% 7min and finally hold at 50% 10min). The heated column was  
691 maintained at 60°C. The mass spectrometer was operated in a data dependent mode with 2 s  
692 cycle time. The MS1 was done in Orbitrap (120000 resolution, scan range 375-1500 m/z, 50 ms  
693 injection time) followed by MS2 in Orbitrap at 30000 resolution (HCD 38%) with TurboTMT  
694 algorithm. Dynamic exclusion was set to 20 s and the isolation width was set to 0.7 m/z. The MS  
695 raw data processing, peptide validation, quantification and differential analysis was conducted  
696 as described before(104). The reverse decoys and common contaminants were added to the  
697 NCBI refseq human protein database (downloaded 2020.03.09) using Philosopher(105). Batch  
698 correction between multiplexes was performed using ComBat(106) as implemented in the R  
699 package Surrogate Variable Analysis (sva) version 3.44.0(107). Group differences were

700 calculated using the moderated t-test as implemented in the R package limma(108) using  
701 default parameters with exception of robust = True, trend = True). Multiple-hypothesis testing  
702 correction was performed with the Benjamini–Hochberg procedure(109). Gene Set Enrichment  
703 Analysis (GSEA)(110) was performed using WebGestalt 2019(111) using the signed log *P*  
704 values from limma. Additional data analysis was performed using R version 4.2 and Python  
705 version 3.10(112), along with third-party scientific computing libraries NumPy(113) and  
706 Pandas(114).

707

#### 708 Human neutrophil flow cytometry

709 Peripheral human neutrophils were isolated as above and pretreated with 50 µg/mL of purified  
710 human THP or mock-treated, and incubated at 37°C in 5% CO<sub>2</sub> for 30 min, and then incubated  
711 for an additional 2.5 h with PMA (25 nM). Cells were pelleted by centrifugation at 500 × *g* for 5  
712 min, washed 1X with PBS, and resuspended in 50 µL of FACS buffer (1mM EDTA, 1% FBS,  
713 0.1% sodium azide in PBS). The following antibodies (0.5 µg/mL) and dyes (concentrations  
714 provided below) were added: Anti-CD11b-FITC (clone M1/70, catalog no. 553310; BD  
715 Biosciences), anti-Ly6G-APC (clone 1A8, catalog no. 127614; BioLegend), Fc Block (catalog  
716 no. 564219; BD Pharmingen), Live/Dead Near IR (1:200 of stock, catalog no. L34975; Thermo  
717 Fisher Scientific), Sytox orange (100 nM, catalog no. S34861; Thermo Fisher Scientific), and  
718 Hoechst 33342 (200 nM, catalog no. 62249; Thermo Fisher Scientific). After a 30-minute  
719 incubation on ice, samples were washed 1X, resuspended in fresh FACS buffer, and run on a  
720 BD FACSCanto II (BD Biosciences). Samples were gated on unstained cells as described in  
721 **Fig. 4A** and positive signals were determined using single-stain controls, and data were  
722 analyzed with FlowJo version 10.9.0 (FlowJo LLC).

723

#### 724 Imaging flow cytometry and analyses

725 Peripheral human neutrophils were isolated as above and pretreated with 50 µg/mL of purified  
726 human THP, sialic acid (500 ng/mL, catalog no. A0812, Sigma Aldrich), or mock-treated, and  
727 incubated at 37°C in 5% CO<sub>2</sub> for 30 min, and then incubated for an additional 2.5 h with PMA  
728 (25 nM). The following antibodies (0.5 µg/mL) and dyes (concentrations provided below) were  
729 added: Anti-MPO-FITC (clone M1/70, catalog no. 553310; BD Biosciences), Fc Block,  
730 Live/Dead Near IR (1:200 of stock, catalog no. L34975; Thermo Fisher Scientific), Sytox orange  
731 (100 nM, catalog no. S34861; Thermo Fisher Scientific), and Hoechst 33342 (200 nM, catalog  
732 no. 62249; Thermo Fisher Scientific). After a 30-minute incubation on ice, samples were  
733 washed 1X, resuspended in a 1:1 mixture of fresh FACS buffer and PBS. Cell morphology via  
734 imaging flow cytometry was assessed as described previously(76). An Amnis ImageStream X  
735 Mark II imaging flow cytometer was used for data acquisition with a 60X objective, low flow rate  
736 and high sensitivity, and 405, 488, 561 and 635 nm lasers set to 120, 150, 100 and 150 mW  
737 respectively. Data were analyzed using the IDEAS version 6.3 software package. Clipped  
738 images were retained due to the large size of NETs, and single stained controls were used for  
739 compensation. Masking was performed using the default “object (tight)” and “morphology”  
740 algorithms as described(76). Statistics reports were generated using IDEAS and processed  
741 IDEAS data analysis files (.daf) were then analyzed in FCS Express 7 to generate analysis  
742 plots.

743

#### 744 Statistics

745 Data were collected from at least two independent experiments unless indicated otherwise.  
746 Mean values from independent experiment replicates, or biological replicates, are represented  
747 by medians with interquartile ranges, or box-and-whisker plots with Tukey’s whiskers as  
748 indicated in figure legends. Experimental samples size (*n*) are indicated in figure legends. All  
749 data sets were subjected to D’Agostino & Pearson normality test to determine whether values  
750 displayed Gaussian distribution before selecting the appropriate parametric or non-parametric

751 analyses. In the instances where *in vitro*, *ex vivo*, and *in vivo* experimental *n* were too small to  
752 determine normality, data were assumed non-parametric. For statistical comparisons of  
753 histopathology and urine sediment scores, mice were grouped into low (0-2) or high (>2)  
754 categories and frequencies were compared by Fisher's exact test between WT and THP KO  
755 genotypes in both UPEC-infected and mock-infected conditions or IgG-treated and Ly6G-  
756 treated conditions respectively. UPEC urine and tissue burdens and THP urine levels were  
757 analyzed using two-tailed Mann-Whitney test. Immune cell populations, UPEC burdens in  
758 neutrophil depletion experiments, and flow cytometry of human and mouse neutrophil  
759 populations were analyzed using two-way ANOVA with Sidak's multiple comparisons test or  
760 uncorrected Fisher's Least Significant Difference (LSD) test as indicated in figure legends.  
761 Imaging flow cytometry populations and murine sialic acid levels were compared using one-way  
762 ANOVA with Holm-Sidak's multiple comparisons test. Proteomics data were analyzed by  
763 moderated t-test followed by multiple-hypothesis testing correction using the Benjamini-  
764 Hochberg procedure with a false discovery rate adjusted  $P < 0.05$ . Statistical analyses were  
765 performed using GraphPad Prism, version 10.0.2 (GraphPad Software Inc., La Jolla, CA, USA).  
766 *P* values  $< 0.05$  were considered statistically significant.

767

#### 768 Study approval

769 Human peripheral blood and urine specimens for THP purification were obtained from healthy  
770 adult volunteers under approval from UC San Diego IRB (131002) and Baylor College of  
771 Medicine IRB (H-47537). All animal protocols and procedures were approved by UCSD and  
772 BCM Institutional Animal Care and Use Committees under protocols S00227M and AN-8233  
773 respectively.

774

#### 775 Data availability

776 The mass spectrometry proteomics data have been deposited to the ProteomeXchange  
777 Consortium via the PRIDE partner repository(115) with the dataset identifier PXD045468. The  
778 ImageStream data is deposited in Figshare under project “ISX data files for THP NETosis  
779 Manuscript,” doi (<https://doi.org/10.6084/m9.figshare.25013786>,  
780 <https://doi.org/10.6084/m9.figshare.25013774>, <https://doi.org/10.6084/m9.figshare.25013744>,  
781 and <https://doi.org/10.6084/m9.figshare.25013651>).

782

### 783 **AUTHOR CONTRIBUTIONS**

784 Research studies were designed by VN and KAP, VME, CC, CS, MEM, JJZ, and KAP  
785 conducted experiments and acquired data, data was analyzed by CC, AS, IC, and KAP, VME  
786 and KAP drafted the manuscript, and all authors contributed to manuscript review and edits.

787

### 788 **ACKNOWLEDGEMENTS**

789 We are grateful to the vivarium staff at UCSD and BCM for animal husbandry and Dr.  
790 Jacqueline Kimmey for helpful discussions. Glycan analyses were performed at the UCSD  
791 GlycoAnalytics Core with assistance from Sulabah Argade, Mousumi Paulchakrabarti, and  
792 Biswa Choudhury. This project was supported by the BCM Mass Spectrometry Proteomics Core  
793 with assistance from Anna Malovannaya, Antrix Jain, and Mei Leng. BCM Mass Spectrometry  
794 Proteomics Core is supported by the Dan L. Duncan Comprehensive Cancer Center NIH award  
795 (P30 CA125123), CPRIT Core Facility Award (RP210227) and NIH High End Instrument award  
796 (S10 OD026804). This project was supported by the BCM Cytometry and Cell Sorting Core with  
797 funding from the CPRIT Core Facility Support Award (CPRIT-RP180672), the NIH (CA125123  
798 and RR024574) and the assistance of Joel M. Sederstrom. VME, MEM, and JJZ were  
799 supported by NIH F31 awards (AI167547, AI167538, DK136201) respectively. Studies were  
800 supported NIH R01 (DK128053) and American Urological Association Research Scholar awards



801 to KAP. The funders had no role in study design, data collection and interpretation, or the  
802 decision to submit the work for publication.

803

## 804 REFERENCES

- 805 1. Terlizzi ME, Gribaudo G, and Maffei ME. UroPathogenic Escherichia coli (UPEC)  
806 Infections: Virulence Factors, Bladder Responses, Antibiotic, and Non-antibiotic  
807 Antimicrobial Strategies. *Front Microbiol.* 2017;8:1566.
- 808 2. Tandogdu Z, and Wagenlehner FM. Global epidemiology of urinary tract infections. *Curr*  
809 *Opin Infect Dis.* 2016;29(1):73-9.
- 810 3. Yang X, Chen H, Zheng Y, Qu S, Wang H, and Yi F. Disease burden and long-term  
811 trends of urinary tract infections: A worldwide report. *Front Public Health.*  
812 2022;10:888205.
- 813 4. Foxman B. Urinary tract infection syndromes: occurrence, recurrence, bacteriology, risk  
814 factors, and disease burden. *Infect Dis Clin North Am.* 2014;28(1):1-13.
- 815 5. Medina M, and Castillo-Pino E. An introduction to the epidemiology and burden of  
816 urinary tract infections. *Ther Adv Urol.* 2019;11:1756287219832172.
- 817 6. Ambite I, Nagy K, Godaly G, Puthia M, Wullt B, and Svanborg C. Susceptibility to  
818 Urinary Tract Infection: Benefits and Hazards of the Antibacterial Host Response.  
819 *Microbiol Spectr.* 2016;4(3).
- 820 7. Godaly G, Ambite I, and Svanborg C. Innate immunity and genetic determinants of  
821 urinary tract infection susceptibility. *Curr Opin Infect Dis.* 2015;28(1):88-96.
- 822 8. Jaillon S, Moalli F, Ragnarsdottir B, Bonavita E, Puthia M, Riva F, et al. The humoral  
823 pattern recognition molecule PTX3 is a key component of innate immunity against  
824 urinary tract infection. *Immunity.* 2014;40(4):621-32.
- 825 9. Chu CM, and Lowder JL. Diagnosis and treatment of urinary tract infections across age  
826 groups. *Am J Obstet Gynecol.* 2018;219(1):40-51.
- 827 10. Bergsten G, Samuelsson M, Wullt B, Leijonhufvud I, Fischer H, and Svanborg C. PapG-  
828 dependent adherence breaks mucosal inertia and triggers the innate host response. *J*  
829 *Infect Dis.* 2004;189(9):1734-42.
- 830 11. Sundac L, Dando SJ, Sullivan MJ, Derrington P, Gerrard J, and Ulett GC. Protein-based  
831 profiling of the immune response to uropathogenic Escherichia coli in adult patients  
832 immediately following hospital admission for acute cystitis. *Pathog Dis.* 2016;74(6).
- 833 12. Isaacson B, Hadad T, Glasner A, Gur C, Granot Z, Bachrach G, et al. Stromal Cell-  
834 Derived Factor 1 Mediates Immune Cell Attraction upon Urinary Tract Infection. *Cell*  
835 *Rep.* 2017;20(1):40-7.
- 836 13. Ingersoll MA, Kline KA, Nielsen HV, and Hultgren SJ. G-CSF induction early in  
837 uropathogenic Escherichia coli infection of the urinary tract modulates host immunity.  
838 *Cell Microbiol.* 2008;10(12):2568-78.
- 839 14. Haraoka M, Hang L, Frendeus B, Godaly G, Burdick M, Strieter R, et al. Neutrophil  
840 recruitment and resistance to urinary tract infection. *J Infect Dis.* 1999;180(4):1220-9.
- 841 15. Frendeus B, Godaly G, Hang L, Karpman D, Lundstedt AC, and Svanborg C. Interleukin  
842 8 receptor deficiency confers susceptibility to acute experimental pyelonephritis and may  
843 have a human counterpart. *J Exp Med.* 2000;192(6):881-90.
- 844 16. Svensson M, Irjala H, Alm P, Holmqvist B, Lundstedt AC, and Svanborg C. Natural  
845 history of renal scarring in susceptible mL-8Rh<sup>-/-</sup> mice. *Kidney Int.* 2005;67(1):103-10.



- 846 17. Hannan TJ, Roberts PL, Riehl TE, van der Post S, Binkley JM, Schwartz DJ, et al.  
847 Inhibition of Cyclooxygenase-2 Prevents Chronic and Recurrent Cystitis. *EBioMedicine*.  
848 2014;1(1):46-57.
- 849 18. Chromek M, Slamova Z, Bergman P, Kovacs L, Podracka L, Ehren I, et al. The  
850 antimicrobial peptide cathelicidin protects the urinary tract against invasive bacterial  
851 infection. *Nat Med*. 2006;12(6):636-41.
- 852 19. Patras KA, Coady A, Babu P, Shing SR, Ha AD, Rooholfada E, et al. Host Cathelicidin  
853 Exacerbates Group B Streptococcus Urinary Tract Infection. *mSphere*. 2020;5(2).
- 854 20. Patras KA, Ha AD, Rooholfada E, Olson J, Ramachandra Rao SP, Lin AE, et al.  
855 Augmentation of Urinary Lactoferrin Enhances Host Innate Immune Clearance of  
856 Uropathogenic Escherichia coli. *J Innate Immun*. 2019;11(6):481-95.
- 857 21. Arao S, Matsuura S, Nonomura M, Miki K, Kabasawa K, and Nakanishi H. Measurement  
858 of urinary lactoferrin as a marker of urinary tract infection. *J Clin Microbiol*.  
859 1999;37(3):553-7.
- 860 22. Schiwon M, Weisheit C, Franken L, Gutweiler S, Dixit A, Meyer-Schwesinger C, et al.  
861 Crosstalk between sentinel and helper macrophages permits neutrophil migration into  
862 infected uroepithelium. *Cell*. 2014;156(3):456-68.
- 863 23. Mundi H, Bjorksten B, Svanborg C, Ohman L, and Dahlgren C. Extracellular release of  
864 reactive oxygen species from human neutrophils upon interaction with Escherichia coli  
865 strains causing renal scarring. *Infect Immun*. 1991;59(11):4168-72.
- 866 24. Gupta A, Sharma S, Nain CK, Sharma BK, and Ganguly NK. Reactive oxygen species-  
867 mediated tissue injury in experimental ascending pyelonephritis. *Kidney Int*.  
868 1996;49(1):26-33.
- 869 25. Condron C, Toomey D, Casey RG, Shaffii M, Creagh T, and Bouchier-Hayes D.  
870 Neutrophil bactericidal function is defective in patients with recurrent urinary tract  
871 infections. *Urol Res*. 2003;31(5):329-34.
- 872 26. Brinkmann V, Reichard U, Goosmann C, Fauler B, Uhlemann Y, Weiss DS, et al.  
873 Neutrophil extracellular traps kill bacteria. *Science*. 2004;303(5663):1532-5.
- 874 27. Metzler KD, Fuchs TA, Nauseef WM, Reumaux D, Roesler J, Schulze I, et al.  
875 Myeloperoxidase is required for neutrophil extracellular trap formation: implications for  
876 innate immunity. *Blood*. 2011;117(3):953-9.
- 877 28. Hoppenbrouwers T, Autar ASA, Sultan AR, Abraham TE, van Cappellen WA,  
878 Houtsmuller AB, et al. In vitro induction of NETosis: Comprehensive live imaging  
879 comparison and systematic review. *PLoS One*. 2017;12(5):e0176472.
- 880 29. Papayannopoulos V. Neutrophil extracellular traps in immunity and disease. *Nat Rev*  
881 *Immunol*. 2018;18(2):134-47.
- 882 30. Tan C, Aziz M, and Wang P. The vitals of NETs. *J Leukoc Biol*. 2021;110(4):797-808.
- 883 31. Yousefi S, Mihalache C, Kozlowski E, Schmid I, and Simon HU. Viable neutrophils  
884 release mitochondrial DNA to form neutrophil extracellular traps. *Cell Death Differ*.  
885 2009;16(11):1438-44.
- 886 32. Yipp BG, Petri B, Salina D, Jenne CN, Scott BN, Zbytniuk LD, et al. Infection-induced  
887 NETosis is a dynamic process involving neutrophil multitasking in vivo. *Nat Med*.  
888 2012;18(9):1386-93.
- 889 33. Pilsczek FH, Salina D, Poon KK, Fahey C, Yipp BG, Sibley CD, et al. A novel  
890 mechanism of rapid nuclear neutrophil extracellular trap formation in response to  
891 *Staphylococcus aureus*. *J Immunol*. 2010;185(12):7413-25.
- 892 34. Yu Y, Kwon K, Tsitrin T, Bekele S, Sikorski P, Nelson KE, et al. Characterization of  
893 Early-Phase Neutrophil Extracellular Traps in Urinary Tract Infections. *PLoS Pathog*.  
894 2017;13(1):e1006151.
- 895 35. Yu Y, Kwon K, and Pieper R. Detection of Neutrophil Extracellular Traps in Urine.  
896 *Methods Mol Biol*. 2019;2021:241-57.

- 897 36. Sharma K, Dhar N, Thacker VV, Simonet TM, Signorino-Gelo F, Knott GW, et al.  
898 Dynamic persistence of UPEC intracellular bacterial communities in a human bladder-  
899 chip model of urinary tract infection. *Elife*. 2021;10.
- 900 37. Mo L, Huang HY, Zhu XH, Shapiro E, Hasty DL, and Wu XR. Tamm-Horsfall protein is a  
901 critical renal defense factor protecting against calcium oxalate crystal formation. *Kidney*  
902 *Int*. 2004;66(3):1159-66.
- 903 38. Liu Y, Goldfarb DS, El-Achkar TM, Lieske JC, and Wu XR. Tamm-Horsfall  
904 protein/uromodulin deficiency elicits tubular compensatory responses leading to  
905 hypertension and hyperuricemia. *Am J Physiol Renal Physiol*. 2018;314(6):F1062-F76.
- 906 39. Bates JM, Raffi HM, Prasad K, Mascarenhas R, Laszik Z, Maeda N, et al. Tamm-  
907 Horsfall protein knockout mice are more prone to urinary tract infection: rapid  
908 communication. *Kidney Int*. 2004;65(3):791-7.
- 909 40. Mo L, Zhu XH, Huang HY, Shapiro E, Hasty DL, and Wu XR. Ablation of the Tamm-  
910 Horsfall protein gene increases susceptibility of mice to bladder colonization by type 1-  
911 fimbriated *Escherichia coli*. *Am J Physiol Renal Physiol*. 2004;286(4):F795-802.
- 912 41. Raffi HS, Bates JM, Jr., Laszik Z, and Kumar S. Tamm-horsfall protein protects against  
913 urinary tract infection by proteus mirabilis. *J Urol*. 2009;181(5):2332-8.
- 914 42. Coady A, Ramos AR, Olson J, Nizet V, and Patras KA. Tamm-Horsfall Protein Protects  
915 the Urinary Tract against *Candida albicans*. *Infect Immun*. 2018;86(12).
- 916 43. Pak J, Pu Y, Zhang ZT, Hasty DL, and Wu XR. Tamm-Horsfall protein binds to type 1  
917 fimbriated *Escherichia coli* and prevents *E. coli* from binding to uroplakin Ia and Ib  
918 receptors. *J Biol Chem*. 2001;276(13):9924-30.
- 919 44. Leeker A, Kreft B, Sandmann J, Bates J, Wasenauer G, Muller H, et al. Tamm-Horsfall  
920 protein inhibits binding of S- and P-fimbriated *Escherichia coli* to human renal tubular  
921 epithelial cells. *Exp Nephrol*. 1997;5(1):38-46.
- 922 45. Harjai K, Mittal R, Chhibber S, and Sharma S. Contribution of Tamm-Horsfall protein to  
923 virulence of *Pseudomonas aeruginosa* in urinary tract infection. *Microbes Infect*.  
924 2005;7(1):132-7.
- 925 46. Weiss GL, Stanisich JJ, Sauer MM, Lin CW, Eras J, Zyla DS, et al. Architecture and  
926 function of human uromodulin filaments in urinary tract infections. *Science*.  
927 2020;369(6506):1005-10.
- 928 47. Yu CL, Lin WM, Liao TS, Tsai CY, Sun KH, and Chen KH. Tamm-Horsfall glycoprotein  
929 (THG) purified from normal human pregnancy urine increases phagocytosis,  
930 complement receptor expressions and arachidonic acid metabolism of  
931 polymorphonuclear neutrophils. *Immunopharmacology*. 1992;24(3):181-90.
- 932 48. Su SJ, Chang KL, Lin TM, Huang YH, and Yeh TM. Uromodulin and Tamm-Horsfall  
933 protein induce human monocytes to secrete TNF and express tissue factor. *J Immunol*.  
934 1997;158(7):3449-56.
- 935 49. Su SJ, and Yeh TM. The dynamic responses of pro-inflammatory and anti-inflammatory  
936 cytokines of human mononuclear cells induced by uromodulin. *Life Sci*.  
937 1999;65(24):2581-90.
- 938 50. Patras KA, Coady A, Olson J, Ali SR, RamachandraRao SP, Kumar S, et al. Tamm-  
939 Horsfall glycoprotein engages human Siglec-9 to modulate neutrophil activation in the  
940 urinary tract. *Immunol Cell Biol*. 2017;95(10):960-5.
- 941 51. Liu Y, El-Achkar TM, and Wu XR. Tamm-Horsfall protein regulates circulating and renal  
942 cytokines by affecting glomerular filtration rate and acting as a urinary cytokine trap. *J*  
943 *Biol Chem*. 2012;287(20):16365-78.
- 944 52. El-Achkar TM, Wu XR, Rauchman M, McCracken R, Kiefer S, and Dagher PC. Tamm-  
945 Horsfall protein protects the kidney from ischemic injury by decreasing inflammation and  
946 altering TLR4 expression. *Am J Physiol Renal Physiol*. 2008;295(2):F534-44.

- 947 53. Micanovic R, Chitteti BR, Dagher PC, Srour EF, Khan S, Hato T, et al. Tamm-Horsfall  
948 Protein Regulates Granulopoiesis and Systemic Neutrophil Homeostasis. *J Am Soc*  
949 *Nephrol.* 2015;26(9):2172-82.
- 950 54. Zulk JJ, Clark JR, Ottinger S, Ballard MB, Mejia ME, Mercado-Evans V, et al. Phage  
951 Resistance Accompanies Reduced Fitness of Uropathogenic Escherichia coli in the  
952 Urinary Environment. *mSphere.* 2022;7(4):e0034522.
- 953 55. Dou W, Thompson-Jaeger S, Laulederkind SJ, Becker JW, Montgomery J, Ruiz-Bustos  
954 E, et al. Defective expression of Tamm-Horsfall protein/uromodulin in COX-2-deficient  
955 mice increases their susceptibility to urinary tract infections. *Am J Physiol Renal Physiol.*  
956 2005;289(1):F49-60.
- 957 56. Mayorek N, Naftali-Shani N, and Grunewald M. Diclofenac inhibits tumor growth in a  
958 murine model of pancreatic cancer by modulation of VEGF levels and arginase activity.  
959 *PLoS One.* 2010;5(9):e12715.
- 960 57. Ghirotto S, Tassi F, Barbujani G, Pattini L, Hayward C, Vollenweider P, et al. The  
961 Uromodulin Gene Locus Shows Evidence of Pathogen Adaptation through Human  
962 Evolution. *J Am Soc Nephrol.* 2016;27(10):2983-96.
- 963 58. Garimella PS, Bartz TM, Ix JH, Chonchol M, Shlipak MG, Devarajan P, et al. Urinary  
964 Uromodulin and Risk of Urinary Tract Infections: The Cardiovascular Health Study. *Am J*  
965 *Kidney Dis.* 2017;69(6):744-51.
- 966 59. Stahl K, Beneke J, Haller H, Gwinner W, and Schiffer M. Reduced Urinary Uromodulin  
967 (UMOD)-Levels Are associated With Urinary Tract Infections (UTI) After Renal  
968 Transplantation. *Am J Transplant.* 2015(15):suppl 3.
- 969 60. Reinhart HH, Spencer JR, Zaki NF, and Sobel JD. Quantitation of urinary Tamm-Horsfall  
970 protein in children with urinary tract infection. *Eur Urol.* 1992;22(3):194-9.
- 971 61. Parsons CL, Proctor J, Teichman JS, Nickel JC, Davis E, Evans R, et al. A multi-site  
972 study confirms abnormal glycosylation in the Tamm-Horsfall protein of patients with  
973 interstitial cystitis. *J Urol.* 2011;186(1):112-6.
- 974 62. Argade S, Chen T, Shaw T, Berecz Z, Shi W, Choudhury B, et al. An evaluation of  
975 Tamm-Horsfall protein glycans in kidney stone formers using novel techniques.  
976 *Urolithiasis.* 2015;43(4):303-12.
- 977 63. Li H, Kostel SA, DiMartino SE, Hashemi Gheinani A, Froehlich JW, and Lee RS.  
978 Uromodulin Isolation and Its N-Glycosylation Analysis by NanoLC-MS/MS. *J Proteome*  
979 *Res.* 2021;20(5):2662-72.
- 980 64. Singhal A, Yadav S, Chandra T, Mulay SR, Gaikwad AN, and Kumar S. An Imaging and  
981 Computational Algorithm for Efficient Identification and Quantification of Neutrophil  
982 Extracellular Traps. *Cells.* 2022;11(2).
- 983 65. Zharkova O, Tay SH, Lee HY, Shubhita T, Ong WY, Lateef A, et al. A Flow Cytometry-  
984 Based Assay for High-Throughput Detection and Quantification of Neutrophil  
985 Extracellular Traps in Mixed Cell Populations. *Cytometry A.* 2019;95(3):268-78.
- 986 66. Masuda S, Shimizu S, Matsuo J, Nishibata Y, Kusunoki Y, Hattanda F, et al.  
987 Measurement of NET formation in vitro and in vivo by flow cytometry. *Cytometry A.*  
988 2017;91(8):822-9.
- 989 67. Perfetto SP, Chattopadhyay PK, Lamoreaux L, Nguyen R, Ambrozak D, Koup RA, et al.  
990 Amine-reactive dyes for dead cell discrimination in fixed samples. *Curr Protoc Cytom.*  
991 2010;Chapter 9:Unit 9 34.
- 992 68. Yousefi S, Simon D, Stojkov D, Karsonova A, Karaulov A, and Simon HU. In vivo  
993 evidence for extracellular DNA trap formation. *Cell Death Dis.* 2020;11(4):300.
- 994 69. Vorobjeva NV, and Chernyak BV. NETosis: Molecular Mechanisms, Role in Physiology  
995 and Pathology. *Biochemistry (Mosc).* 2020;85(10):1178-90.

- 996 70. Swensen AC, He J, Fang AC, Ye Y, Nicora CD, Shi T, et al. A Comprehensive Urine  
997 Proteome Database Generated From Patients With Various Renal Conditions and  
998 Prostate Cancer. *Front Med (Lausanne)*. 2021;8:548212.
- 999 71. Parker H, Dragunow M, Hampton MB, Kettle AJ, and Winterbourn CC. Requirements for  
1000 NADPH oxidase and myeloperoxidase in neutrophil extracellular trap formation differ  
1001 depending on the stimulus. *J Leukoc Biol*. 2012;92(4):841-9.
- 1002 72. Fuchs TA, Abed U, Goosmann C, Hurwitz R, Schulze I, Wahn V, et al. Novel cell death  
1003 program leads to neutrophil extracellular traps. *J Cell Biol*. 2007;176(2):231-41.
- 1004 73. Thiam HR, Wong SL, Qiu R, Kittisopikul M, Vahabikashi A, Goldman AE, et al. NETosis  
1005 proceeds by cytoskeleton and endomembrane disassembly and PAD4-mediated  
1006 chromatin decondensation and nuclear envelope rupture. *Proc Natl Acad Sci U S A*.  
1007 2020;117(13):7326-37.
- 1008 74. Remijsen Q, Vanden Berghe T, Wirawan E, Asselbergh B, Parthoens E, De Rycke R, et  
1009 al. Neutrophil extracellular trap cell death requires both autophagy and superoxide  
1010 generation. *Cell Res*. 2011;21(2):290-304.
- 1011 75. Neubert E, Meyer D, Rocca F, Gunay G, Kwaczala-Tessmann A, Grandke J, et al.  
1012 Chromatin swelling drives neutrophil extracellular trap release. *Nat Commun*.  
1013 2018;9(1):3767.
- 1014 76. Lelliott PM, Momota M, Lee MSJ, Kuroda E, Iijima N, Ishii KJ, et al. Rapid Quantification  
1015 of NETs In Vitro and in Whole Blood Samples by Imaging Flow Cytometry. *Cytometry A*.  
1016 2019;95(5):565-78.
- 1017 77. Barbu EA, Dominical VM, Mendelsohn L, and Thein SL. Detection and Quantification of  
1018 Histone H4 Citrullination in Early NETosis With Image Flow Cytometry Version 4. *Front*  
1019 *Immunol*. 2020;11:1335.
- 1020 78. Raffi HS, Bates JM, Jr., Laszik Z, and Kumar S. Tamm-Horsfall protein acts as a general  
1021 host-defense factor against bacterial cystitis. *Am J Nephrol*. 2005;25(6):570-8.
- 1022 79. El-Achkar TM, McCracken R, Rauchman M, Heitmeier MR, Al-Aly Z, Dagher PC, et al.  
1023 Tamm-Horsfall protein-deficient thick ascending limbs promote injury to neighboring S3  
1024 segments in an MIP-2-dependent mechanism. *Am J Physiol Renal Physiol*.  
1025 2011;300(4):F999-1007.
- 1026 80. Liu Y, Mo L, Goldfarb DS, Evan AP, Liang F, Khan SR, et al. Progressive renal papillary  
1027 calcification and ureteral stone formation in mice deficient for Tamm-Horsfall protein. *Am*  
1028 *J Physiol Renal Physiol*. 2010;299(3):F469-78.
- 1029 81. Olczak T, Olczak M, Kubicz A, Dulawa J, and Kokot F. Composition of the sugar moiety  
1030 of Tamm-Horsfall protein in patients with urinary diseases. *Int J Clin Lab Res*.  
1031 1999;29(2):68-74.
- 1032 82. Prasadani K, Bates J, Badgett A, Dell M, Sukhatme V, Yu H, et al. Nucleotide sequence  
1033 and peptide motifs of mouse uromodulin (Tamm-Horsfall protein)--the most abundant  
1034 protein in mammalian urine. *Biochim Biophys Acta*. 1995;1260(3):328-32.
- 1035 83. Hedlund M, Tangvoranuntakul P, Takematsu H, Long JM, Housley GD, Kozutsumi Y, et  
1036 al. N-glycolylneuraminic acid deficiency in mice: implications for human biology and  
1037 evolution. *Mol Cell Biol*. 2007;27(12):4340-6.
- 1038 84. Fischer H, Lutay N, Ragnarsdottir B, Yadav M, Jonsson K, Urbano A, et al. Pathogen  
1039 specific, IRF3-dependent signaling and innate resistance to human kidney infection.  
1040 *PLoS Pathog*. 2010;6(9):e1001109.
- 1041 85. Moreira-Teixeira L, Stimpson PJ, Stavropoulos E, Hadebe S, Chakravarty P, Ioannou M,  
1042 et al. Type I IFN exacerbates disease in tuberculosis-susceptible mice by inducing  
1043 neutrophil-mediated lung inflammation and NETosis. *Nat Commun*. 2020;11(1):5566.
- 1044 86. Pylaeva E, Bordbari S, Spyra I, Decker AS, Haussler S, Vybornov V, et al. Detrimental  
1045 Effect of Type I IFNs During Acute Lung Infection With *Pseudomonas aeruginosa* Is  
1046 Mediated Through the Stimulation of Neutrophil NETosis. *Front Immunol*. 2019;10:2190.



- 1047 87. Krivosikova K, Supcikova N, Gaal Kovalcikova A, Janko J, Pastorek M, Celec P, et al.  
1048 Neutrophil extracellular traps in urinary tract infection. *Front Pediatr*. 2023;11:1154139.
- 1049 88. Petretto A, Bruschi M, Pratesi F, Croia C, Candiano G, Ghiggeri G, et al. Neutrophil  
1050 extracellular traps (NET) induced by different stimuli: A comparative proteomic analysis.  
1051 *PLoS One*. 2019;14(7):e0218946.
- 1052 89. Wang X, Zhao J, Cai C, Tang X, Fu L, Zhang A, et al. A Label-Free Quantitative  
1053 Proteomic Analysis of Mouse Neutrophil Extracellular Trap Formation Induced by  
1054 *Streptococcus suis* or Phorbol Myristate Acetate (PMA). *Front Immunol*. 2018;9:2615.
- 1055 90. Aquino EN, Neves AC, Santos KC, Uribe CE, Souza PE, Correa JR, et al. Proteomic  
1056 Analysis of Neutrophil Priming by PAF. *Protein Pept Lett*. 2016;23(2):142-51.
- 1057 91. Aarts CEM, Downes K, Hoogendijk AJ, Sprenkeler EGG, Gazendam RP, Favier R, et al.  
1058 Neutrophil specific granule and NETosis defects in gray platelet syndrome. *Blood Adv*.  
1059 2021;5(2):549-64.
- 1060 92. Khan MA, and Palaniyar N. Transcriptional firing helps to drive NETosis. *Sci Rep*.  
1061 2017;7:41749.
- 1062 93. Bjornsdottir H, Welin A, Michaelsson E, Osla V, Berg S, Christenson K, et al. Neutrophil  
1063 NET formation is regulated from the inside by myeloperoxidase-processed reactive  
1064 oxygen species. *Free Radic Biol Med*. 2015;89:1024-35.
- 1065 94. Stojkov D, Amini P, Oberson K, Sokollik C, Duppenhaler A, Simon HU, et al. ROS and  
1066 glutathionylation balance cytoskeletal dynamics in neutrophil extracellular trap formation.  
1067 *J Cell Biol*. 2017;216(12):4073-90.
- 1068 95. Douda DN, Khan MA, Grasemann H, and Palaniyar N. SK3 channel and mitochondrial  
1069 ROS mediate NADPH oxidase-independent NETosis induced by calcium influx. *Proc*  
1070 *Natl Acad Sci U S A*. 2015;112(9):2817-22.
- 1071 96. von Gunten S, Yousefi S, Seitz M, Jakob SM, Schaffner T, Seger R, et al. Siglec-9  
1072 transduces apoptotic and nonapoptotic death signals into neutrophils depending on the  
1073 proinflammatory cytokine environment. *Blood*. 2005;106(4):1423-31.
- 1074 97. Zhao W, Fogg DK, and Kaplan MJ. A novel image-based quantitative method for the  
1075 characterization of NETosis. *J Immunol Methods*. 2015;423:104-10.
- 1076 98. Secundino I, Lizcano A, Roupe KM, Wang X, Cole JN, Olson J, et al. Host and pathogen  
1077 hyaluronan signal through human siglec-9 to suppress neutrophil activation. *J Mol Med*  
1078 *(Berl)*. 2016;94(2):219-33.
- 1079 99. Khatua B, Bhattacharya K, and Mandal C. Sialoglycoproteins adsorbed by  
1080 *Pseudomonas aeruginosa* facilitate their survival by impeding neutrophil extracellular  
1081 trap through siglec-9. *J Leukoc Biol*. 2012;91(4):641-55.
- 1082 100. Scharf B, Sendker J, Dobrindt U, and Hensel A. Influence of Cranberry Extract on  
1083 Tamm-Horsfall Protein in Human Urine and its Antiadhesive Activity Against  
1084 Uropathogenic *Escherichia coli*. *Planta Med*. 2019;85(2):126-38.
- 1085 101. Mo B, Sendker J, Herrmann F, Nowak S, and Hensel A. Aqueous extract from  
1086 *Equisetum arvense* stimulates the secretion of Tamm-Horsfall protein in human urine  
1087 after oral intake. *Phytomedicine*. 2022;104:154302.
- 1088 102. Mulvey MA, Schilling JD, and Hultgren SJ. Establishment of a persistent *Escherichia coli*  
1089 reservoir during the acute phase of a bladder infection. *Infect Immun*. 2001;69(7):4572-  
1090 9.
- 1091 103. Mertins P, Yang F, Liu T, Mani DR, Petyuk VA, Gillette MA, et al. Ischemia in tumors  
1092 induces early and sustained phosphorylation changes in stress kinase pathways but  
1093 does not affect global protein levels. *Mol Cell Proteomics*. 2014;13(7):1690-704.
- 1094 104. Nozawa K, Garcia TX, Kent K, Leng M, Jain A, Malovannaya A, et al. Testis-specific  
1095 serine kinase 3 is required for sperm morphogenesis and male fertility. *Andrology*.  
1096 2023;11(5):826-39.

- 1097 105. da Veiga Leprevost F, Haynes SE, Avtonomov DM, Chang HY, Shanmugam AK,  
1098 Mellacheruvu D, et al. Philosopher: a versatile toolkit for shotgun proteomics data  
1099 analysis. *Nat Methods*. 2020;17(9):869-70.
- 1100 106. Johnson WE, Li C, and Rabinovic A. Adjusting batch effects in microarray expression  
1101 data using empirical Bayes methods. *Biostatistics*. 2007;8(1):118-27.
- 1102 107. Leek J, Johnson W, Parker H, Fertig E, Jaffe A, Zhang Y, et al. Surrogate Variable  
1103 Analysis (sva) version 3.44.0. 2022.
- 1104 108. Ritchie ME, Phipson B, Wu D, Hu Y, Law CW, Shi W, et al. limma powers differential  
1105 expression analyses for RNA-sequencing and microarray studies. *Nucleic Acids Res*.  
1106 2015;43(7):e47.
- 1107 109. Benjamini Y, and Hochberg Y. Controlling the False Discovery Rate: A Practical and  
1108 Powerful Approach to Multiple Testing. *J R Statist Soc B*. 1995;57(1):289-300.
- 1109 110. Subramanian A, Tamayo P, Mootha VK, Mukherjee S, Ebert BL, Gillette MA, et al. Gene  
1110 set enrichment analysis: a knowledge-based approach for interpreting genome-wide  
1111 expression profiles. *Proc Natl Acad Sci U S A*. 2005;102(43):15545-50.
- 1112 111. Liao Y, Wang J, Jaehnig EJ, Shi Z, and Zhang B. WebGestalt 2019: gene set analysis  
1113 toolkit with revamped UIs and APIs. *Nucleic Acids Res*. 2019;47(W1):W199-W205.
- 1114 112. Anon. Python Package Index - PyPI. 2021.
- 1115 113. Harris CR, Millman KJ, van der Walt SJ, Gommers R, Virtanen P, Cournapeau D, et al.  
1116 Array programming with NumPy. *Nature*. 2020;585(7825):357-62.
- 1117 114. team Tpd. pandas-dev/pandas: Pandas. 2020.
- 1118 115. Perez-Riverol Y, Bai J, Bandla C, Garcia-Seisdedos D, Hewapathirana S,  
1119 Kamatchinathan S, et al. The PRIDE database resources in 2022: a hub for mass  
1120 spectrometry-based proteomics evidences. *Nucleic Acids Res*. 2022;50(D1):D543-D52.
- 1121

## 1122 **FIGURE LEGENDS**

1123

### 1124 **Figure 1. THP deficiency increases urinary tract bacterial burdens and tissue pathology.**

1125 Wild type (WT) and THP knockout (THP KO) mice were transurethrally infected with  $10^8$  CFU of  
1126 UPEC strain UTI89 or mock-infected as a control. Time course of urine (A), bladder(B), and  
1127 kidney (C) UPEC burdens from WT and THP KO mice. Bladder (D) and kidney (E) pathology  
1128 scores on days 1 and 3 post-infection. (F) Representative H&E images of day 1 bladders from  
1129 UPEC-infected or mock-infected WT and THP KO mice. (G) Representative H&E images of day  
1130 3 kidneys from UPEC-infected or mock-infected WT and THP KO mice. Scale bars represent  
1131 110  $\mu$ m (F) and 210  $\mu$ m (G). Black arrows point to polymorphonuclear cell infiltration and blue  
1132 arrows point to polymorphonuclear cell aggregates in the renal pelvis. Experiments were  
1133 performed at least two times with data combined.  $n = 18-46$ /timepoint (A),  $n = 11-31$  (B-C), or  $n$   
1134  $= 4-15$  (D-E). Box and whisker plots extend from 25th to 75th percentiles and show all points (A-

1135 C). Points represent individual samples and lines indicate medians (D, E). Data was analyzed  
1136 by two-tailed Mann-Whitney t-test (A-C) and two-sided Fisher's exact test (D, E). \*  $P < 0.05$ ; \*\*  $P$   
1137  $< 0.01$ .

1138

1139 **Figure 2. THP deficiency increases bladder neutrophil infiltration and reduces bacterial**  
1140 **burdens upon neutrophil depletion during UTI.** Wild type (WT) and THP knockout (THP KO)  
1141 mice were transurethraly infected with  $10^8$  CFU of UPEC strain UTI89 or mock-infected as a  
1142 control. **(A)** Gating strategy for quantifying immune populations of interest with a focus on  
1143 neutrophils (Ly6G<sup>+</sup>) and myeloid lineages (CD11b $\pm$ , CD11c $\pm$ ). Frequency of CD45<sup>+</sup> cells (P1)  
1144 cells in bladder **(B)** or kidneys **(C)** in UPEC-challenged or mock-infected THP WT and KO mice  
1145 3 and 7 days post-infection (dpi). Mock-infected samples from both timepoints were combined  
1146 prior to analyses. Frequency of neutrophils (Ly6G<sup>+</sup>) from CD45<sup>+</sup> populations infiltrating bladder  
1147 **(D)** or kidneys **(E)** in UPEC-challenged or mock-infected mice 3 and 7 days post-infection. To  
1148 partially deplete neutrophils, mice were administered anti-Ly6G or IgG isotype control just prior  
1149 to bacterial inoculation and on day 2 and 4 post-inoculation. **(F)** Urine sediment scores at 6 days  
1150 post-infection. **(G)** Urine UPEC burdens at 6 days post-infection. Bladder **(H)** and kidney **(I)**  
1151 UPEC burdens at 7 days post-infection. Experiments were performed at least two times with  
1152 data combined.  $n = 5-32$ /group (B-E) and  $n = 7-10$  (F-I). Box and whisker plots extend from 25th  
1153 to 75th percentiles and show all points (B-I). Data was analyzed by two-way ANOVA with  
1154 Sidak's multiple comparisons test (B-E, G-I) and two-sided Fisher's exact test (F). \*  $P < 0.05$ ; \*\*  
1155  $P < 0.01$ ; \*\*\*  $P < 0.001$ .

1156

1157 **Figure 3. Tamm-Horsfall protein levels and glycosylation patterns change minimally**  
1158 **during urinary tract infection *in vivo*.** Mouse urine was collected multiple times over the first 4  
1159 days post-inoculation from UPEC-infected and mock-infected WT mice. **(A)** THP levels in urine  
1160 as measured by ELISA. N-glycan MALDI-tof profiles of urinary THP isolated from WT mice that

1161 were either mock (**B**) or UPEC-infected (**C**). Data represent one MALDI-tof analysis of purified  
1162 THP harvested from WT mice ( $n = 15$  mock,  $n = 28$  UPEC) from two independent experiments.  
1163 Prominent peaks with proportional differences between UPEC-infected and mock samples ( $m/z$   
1164 2967 and  $m/z$  4588) are highlighted in teal. Data (A) was analyzed by two-tailed Mann-Whitney  
1165 t-test and comparisons were not significant.

1166

1167 **Figure 4. Neutrophil nonclassical NETosis populations are decreased in THP-deficient**  
1168 **mice during UTI.** Urine was collected from WT and THP KO mice 24 hours post-infection with  
1169 UPEC or mock-infected as controls. (**A**) Gating strategy for quantifying neutrophil  
1170 (polymorphonuclear cells, PMNs, Ly6G+, CD11b+, P4) subpopulations of interest with a focus  
1171 on nonclassical NETosis (extracellular DNA[Sytox Orange]+, Live/Dead-), classical NETosis  
1172 (exDNA+, Live/Dead+), dead PMNs (exDNA-, Live/Dead+), and live PMNs (exDNA-, Live/Dead-  
1173 ). (**B**) Total PMNs (P4) per mL of urine. Frequency of live PMNs (**C**) and dead PMNs (**D**) out of  
1174 total PMNs. (**E**) Frequency of total NETosis (Q1 + Q2) out of total PMNs. Frequency of classical  
1175 NETosis (Q2) (**F**) and nonclassical NETosis (Q1) (**G**) out of total PMNs. (**H**) Nonclassical  
1176 NETosis cell counts per mL of urine. Urine samples from UPEC-infected WT (**I**) and THP KO (**J**)  
1177 mice were mounted on slides and NETs were visualized via immunofluorescence using  
1178 antibodies against myeloperoxidase (MPO, cyan channel), citrullinated histone H3 (H3Cit, red  
1179 channel), and THP (green channel). Nucleic acids were stained using Hoechst dye (blue  
1180 channel). Yellow arrows point to NETs structures depicted as strands of DNA dotted with MPO  
1181 staining. Representative images are shown. Scale bars represent 20  $\mu\text{m}$  (single channels) and  
1182 30  $\mu\text{m}$  (inset overlays). Experiments were performed at least two times with data combined.  $n =$   
1183 7-16/group (B-H). Box and whisker plots extend from 25th to 75th percentiles and show all  
1184 points (B-H). Data were analyzed by two-way ANOVA with uncorrected Fisher's Least  
1185 Significant Difference (LSD) test (B-H). \*  $P < 0.05$ ; \*\*  $P < 0.01$ ; \*\*\*  $P < 0.001$ ; \*\*\*\*  $P < 0.0001$   
1186



1187 **Figure 5. THP modestly alters neutrophil responses to NETosis stimulation by PMA.**  
1188 Peripheral human neutrophils were isolated, pretreated with THP, and stimulated phorbol 12-  
1189 myristate 13-acetate (PMA) for 2.5-3 hours as described in Methods. **(A)** NET formation was  
1190 assessed by released dsDNA (detected by PicoGreen dye) and expressed as arbitrary units  
1191 (A.U.) of fluorescence normalized to mock-treated, unstimulated controls. Neutrophil cell pellets  
1192 from four donors were subjected to tandem mass tag-based proteomics profiling. **(B)** Principal  
1193 component analysis of neutrophils that were untreated (UnTx), treated with THP (THP),  
1194 untreated with PMA stimulation (PMA), and THP-treated with PMA stimulation (THP+PMA).  
1195 Each point represents an individual sample, colored by treatment, with paired donor samples  
1196 indicated by matched symbol. **(C)** Venn diagram showing the proportion of proteins differentially  
1197 detected in THP-treated samples compared to untreated samples in the presence (PMA and  
1198 THP+PMA) vs. absence (UnTx and THP) of PMA stimulation. Volcano plot **(D)** and gene set  
1199 enrichment analysis **(E)** of differentially identified proteins in untreated vs. THP-treated samples.  
1200 NES = Normalized Enrichment Score. Volcano plot **(F)** and gene set enrichment analysis **(G)** of  
1201 differentially identified proteins in PMA vs. THP+PMA samples. Experiments were performed as  
1202 part of three independent experiments with data combined,  $n = 5$  donors (A), or as part of one  
1203 independent experiment,  $n = 4$  donors (B-G). Box and whisker plots extend from 25th to 75th  
1204 percentiles and show all points (A). Data (A) were analyzed by two-way ANOVA with Sidak's  
1205 multiple comparisons test. Differential proteins (C-I) were identified via  $\text{Log}_2$  fold change  $>1.25$   
1206 and moderated t-test followed by multiple-hypothesis testing correction using the Benjamini-  
1207 Hochberg procedure with a false discovery rate adjusted  $P < 0.05$ . Individual proteins are listed  
1208 in **Supplemental Table 2**. GSEA was performed with a gene set minimum of 10, a gene set  
1209 maximum of 500, 2,000 permutations using the gene ontology cellular component gene sets.

1210

1211 **Figure 6. THP exposure increases NETosis in human neutrophils.** Peripheral human  
1212 neutrophils were isolated, pretreated with THP, and stimulated phorbol 12-myristate 13-acetate

1213 (PMA) for 2.5 hours. **(A)** Gating strategy for quantifying neutrophil NETosis (extracellular DNA  
1214 [Sytox Orange]<sup>+</sup>, MPO<sup>+</sup>, P3) subpopulations of interest with a focus on nonclassical NETosis  
1215 (Hoechst<sup>var</sup>, Live/Dead<sup>-</sup>) and classical NETosis (Hoechst<sup>hi</sup>, Live/Dead<sup>+</sup>). **(B)** Total NETosis (P3)  
1216 cell counts across treatment groups. **(C)** Nonclassical NETosis (P4) cell counts across  
1217 treatment groups. **(D)** Classical NETosis (P5) cell counts across treatment groups. Peripheral  
1218 human neutrophils were pretreated with THP or mock-treated as above and subsequently  
1219 stimulated with either PMA, H<sub>2</sub>O<sub>2</sub>, or PMA + DPI (diphenyleneiodonium, an inhibitor of ROS).  
1220 Frequency of nonclassical NETosis (P4) cells **(E)** or classical NETosis (P5) cells **(F)** normalized  
1221 to frequency of unstimulated cells from the same donor. Experiments were performed in at least  
1222 four independent experiments with data combined,  $n = 6$  donors (B-D), or  $n = 5$  donors (E-F).  
1223 Box and whisker plots extend from 25th to 75th percentiles and show all points (B-F). Data were  
1224 analyzed by two-way ANOVA with Sidak's multiple comparisons test (B-F). \*  $P < 0.05$ ; \*\*  $P <$   
1225  $0.01$ ; \*\*\*\*  $P < 0.0001$ .

1226

1227 **Figure 7. THP exposure alters proportions of NETs and other cellular morphologies as**  
1228 **determined by imaging flow cytometry.** Peripheral human neutrophils were isolated,  
1229 pretreated with THP or sialic acid, and stimulated phorbol 12-myristate 13-acetate (PMA) for 2.5  
1230 hours. Cells were stained with anti-MPO FITC, Sytox Orange (non-membrane permeable  
1231 nucleic acid dye), Hoechst (membrane-permeable nucleic acid dye), and Live/Dead stain (non-  
1232 membrane permeable amine-reactive dye) and visualized for fluorescence and brightfield (BF)  
1233 images on an imaging flow cytometer. **(A)** Gating strategy of human neutrophils subpopulations  
1234 with representative images shown **(B)**. NETs (Type III) are gated from Hoechst<sup>+</sup> cells based on  
1235 high Hoechst intensity and extracellular DNA area (Sytox Orange staining beyond cell margins),  
1236 whereas NET DNA fragments (Type IV) were gated as high extracellular DNA with lower  
1237 Hoechst intensity. Remaining cell populations are collected from focused cells and gated based  
1238 on Sytox Orange intensity (indicating cell permeability) and Hoechst area to monitor nuclear

1239 morphology. Two dead cell populations (high Sytox Orange intensity and confirmed by  
1240 Live/Dead staining) were separated into dead cells with condensed nuclei (Type V) and dead  
1241 cells with decondensed nuclei (Type VI). Live cell populations (low Sytox Orange intensity and  
1242 absence of Live/Dead stain) were separated into cells with decondensed nuclei (Type II) and  
1243 live cells (Type I). Frequency of NETs and NETs DNA fragments (Type III and IV) (**C**), live cells  
1244 with decondensed nuclei (Type II) (**D**), dead cells with condensed nuclei (Type V) (**E**), dead  
1245 cells with decondensed nuclei (Type VI) (**F**), and live cells (Type I) (**G**). Experiments were  
1246 performed in four independent experiments with data combined,  $n = 4$  donors. Box and whisker  
1247 plots extend from 25th to 75th percentiles and show all points (C-G). Data were analyzed by  
1248 one-way ANOVA with Holm-Sidak's multiple comparisons test (C-G). \*  $P < 0.05$ .

1249

## 1250 TABLES

1251

**Table 1.**

| Sialic acid<br>[ $\mu\text{mol}/\mu\text{g}$ of<br>protein] | WT Mock               | WT UPEC              | $P$ value<br>WT Mock vs.<br>WT UPEC | THP KO<br>Control    | $P$ value<br>WT Mock<br>vs. THP KO |
|-------------------------------------------------------------|-----------------------|----------------------|-------------------------------------|----------------------|------------------------------------|
| Neu5Gc (95% CI)                                             | 1.133 ( $\pm 4.47$ )  | 1.048 ( $\pm 8.10$ ) | 0.9892                              | 0.581 ( $\pm 1.57$ ) | 0.6682                             |
| Neu5Ac (95% CI)                                             | 11.77 ( $\pm 11.89$ ) | 12.53 ( $\pm 12.5$ ) | 0.6771                              | 0.759 ( $\pm 0.26$ ) | <b>0.0020</b>                      |
| Total (95% CI)                                              | 12.91 ( $\pm 16.36$ ) | 13.58 ( $\pm 13.7$ ) | 0.8806                              | 1.339 ( $\pm 1.83$ ) | <b>0.0072</b>                      |

1252 **Table 1. Sialic acid concentration in THP purified from mouse urine.** Sialic acid content of  
1253 THP isolated from pooled mouse urine from WT and THP KO mice as measured by UPLC. Data  
1254 represent two independent replicate experiments. Data were analyzed by one-way ANOVA with  
1255 Holmes-Sidak multiple comparison tests.



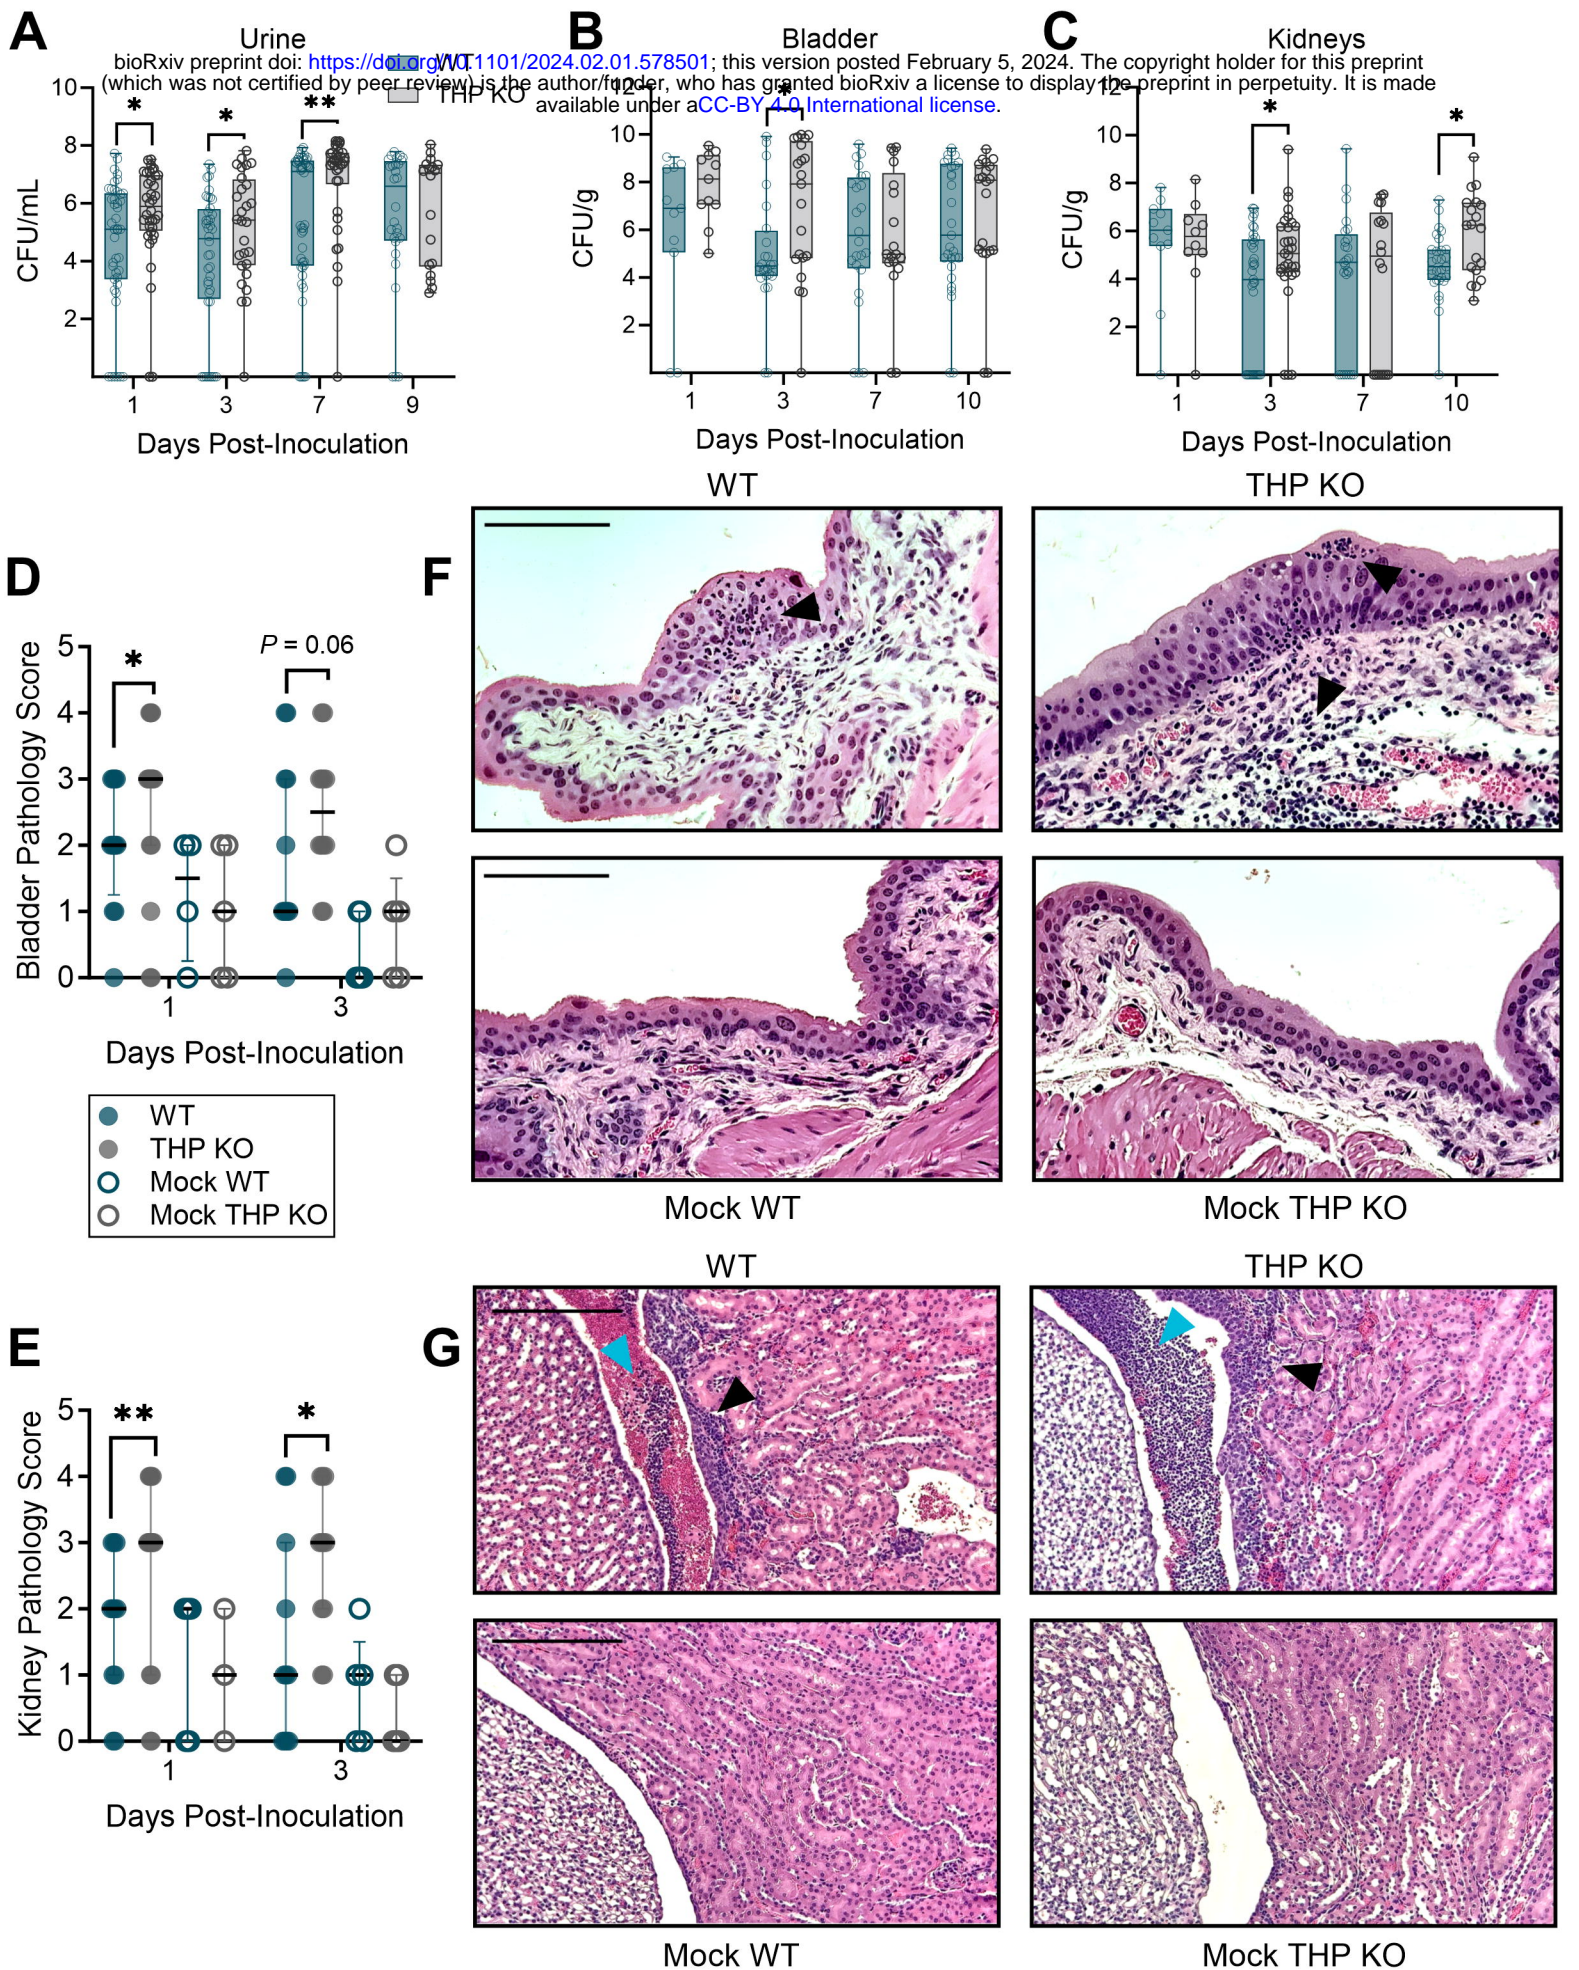

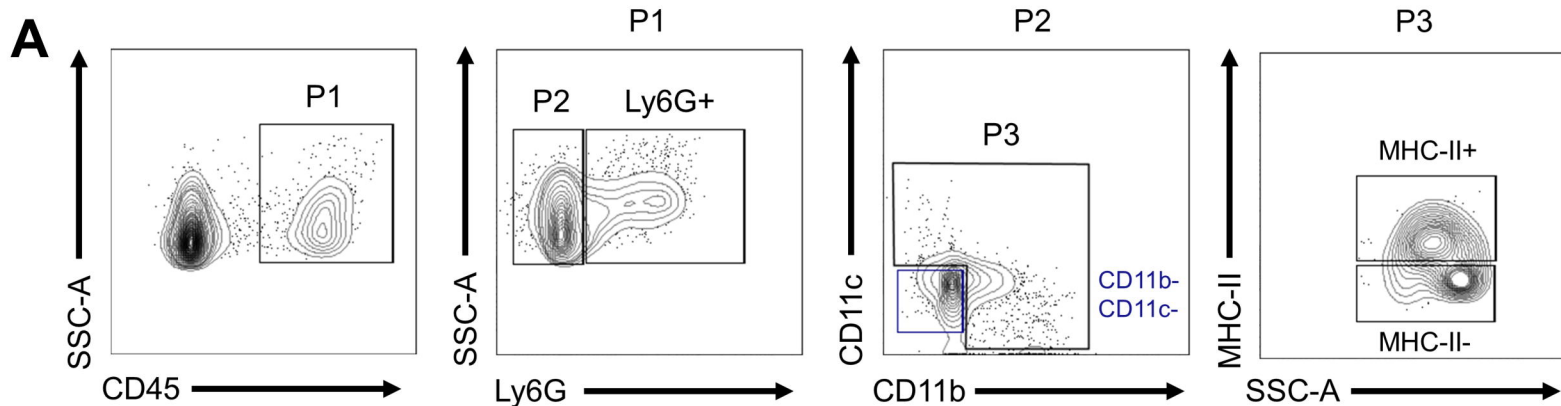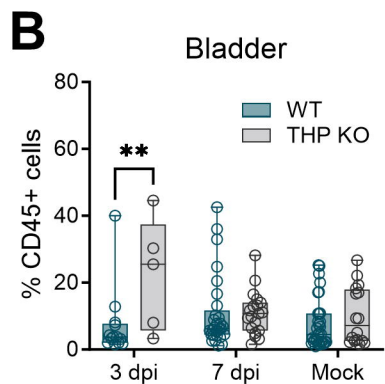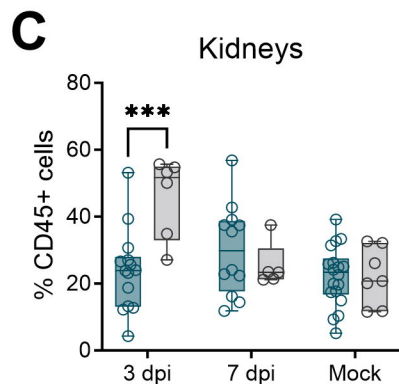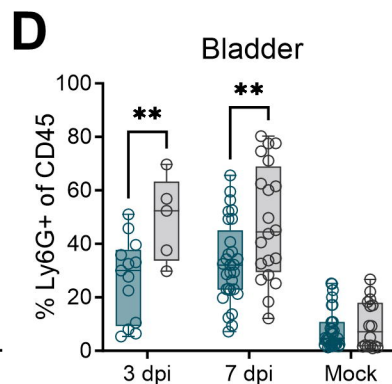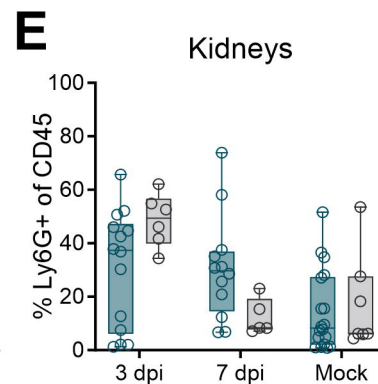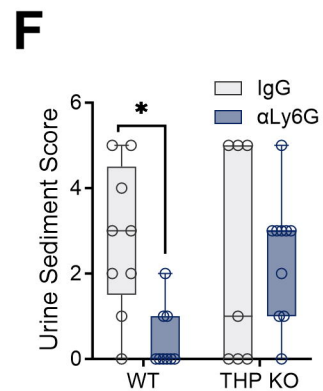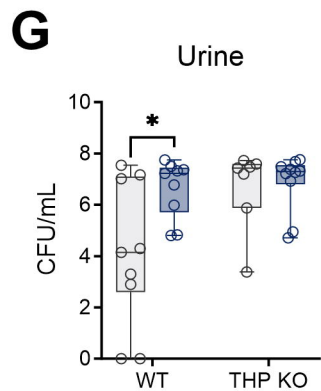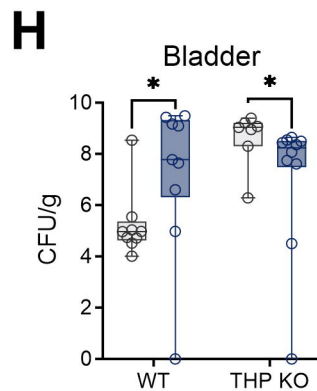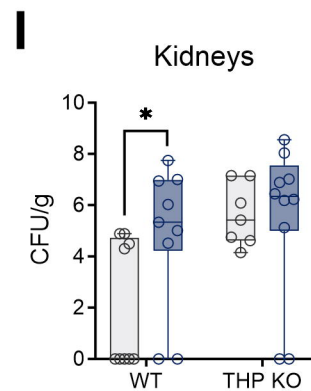



**A**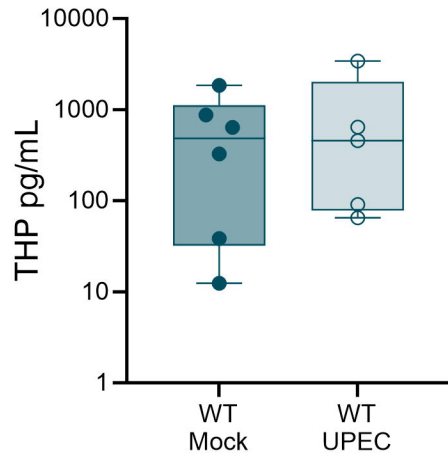**B**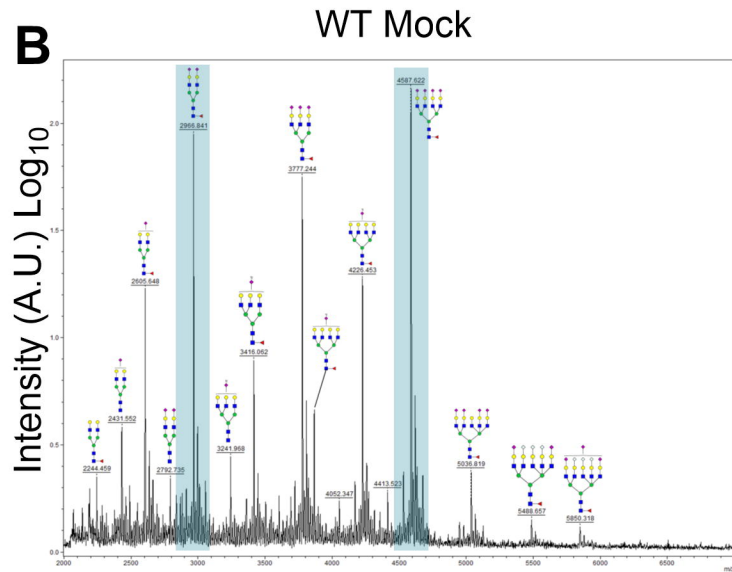**C**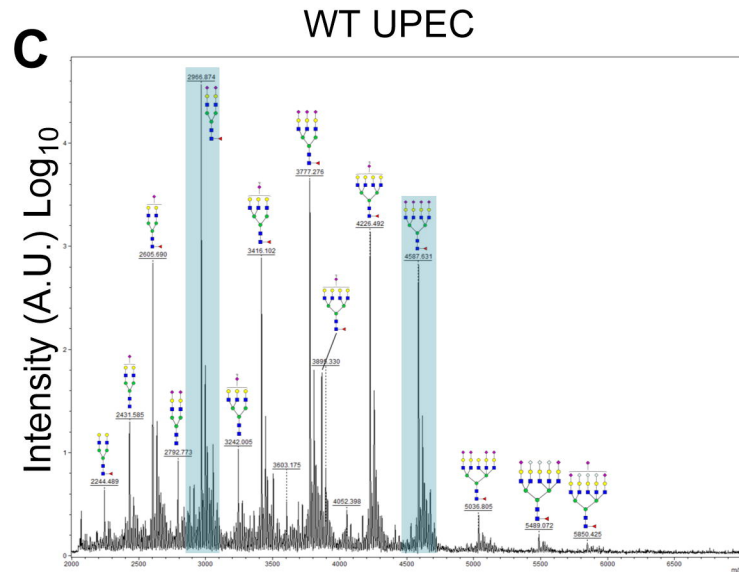

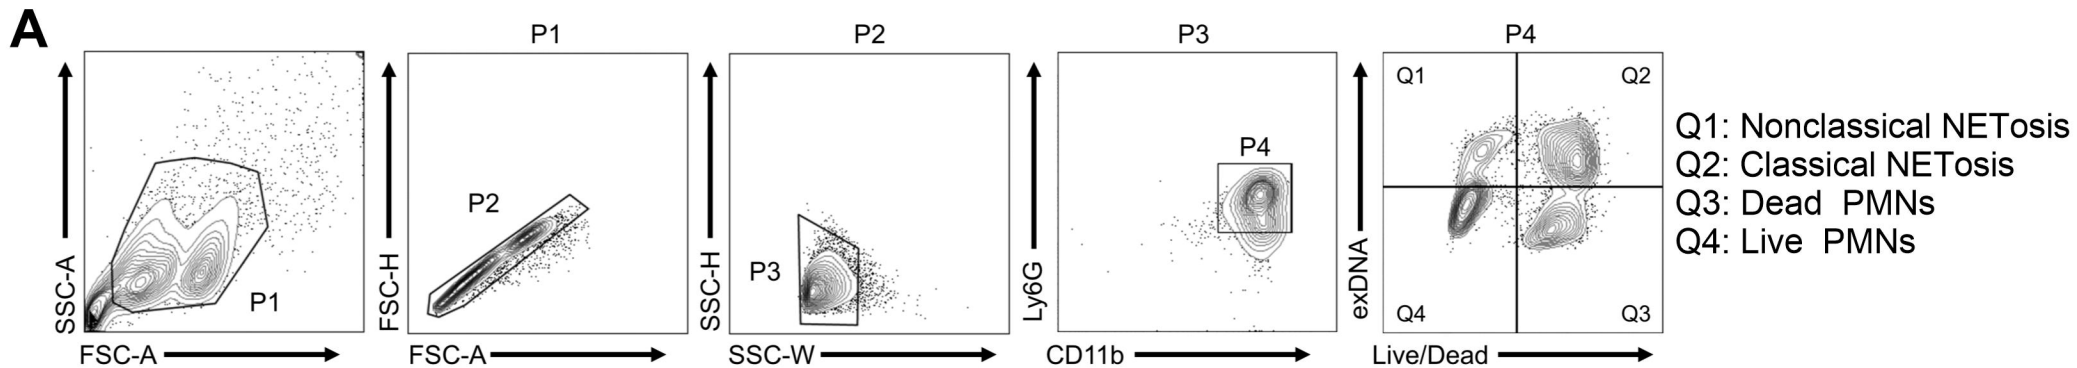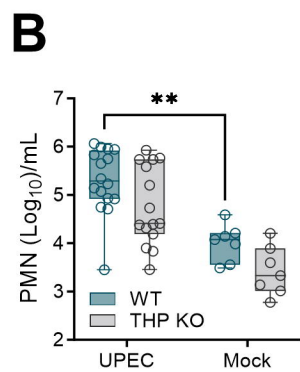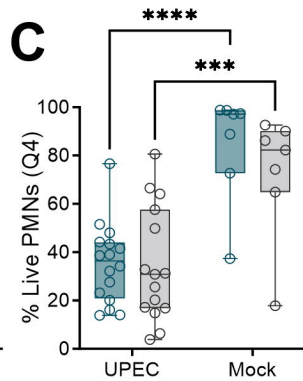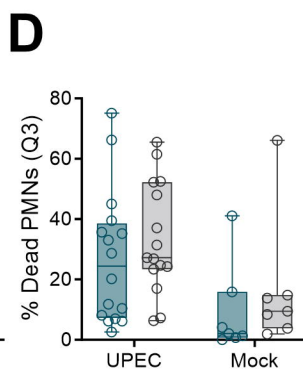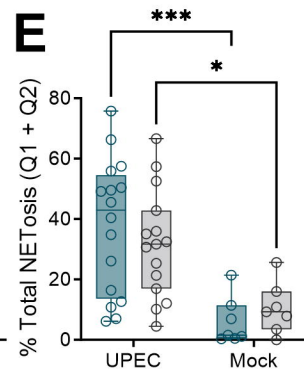

WT

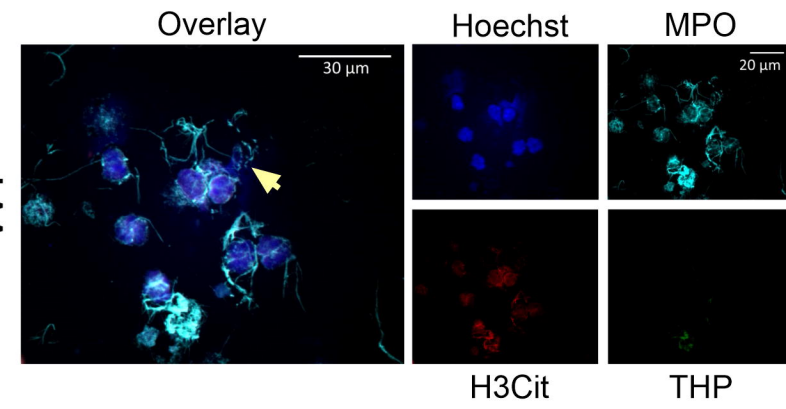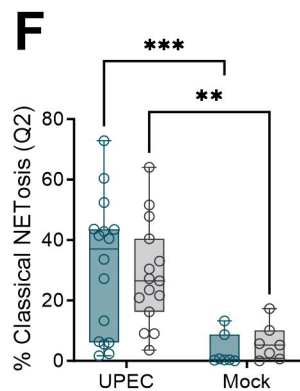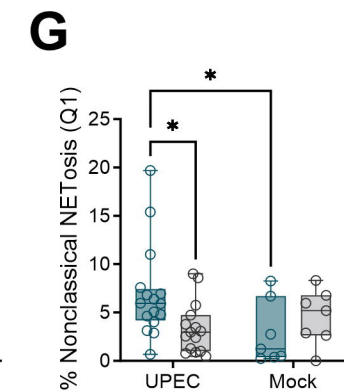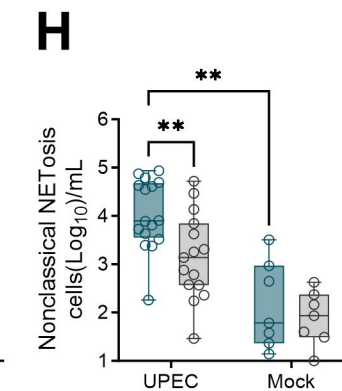

THP KO

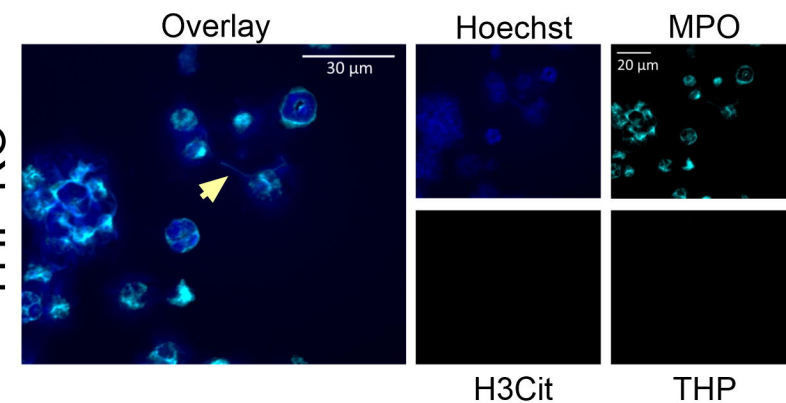



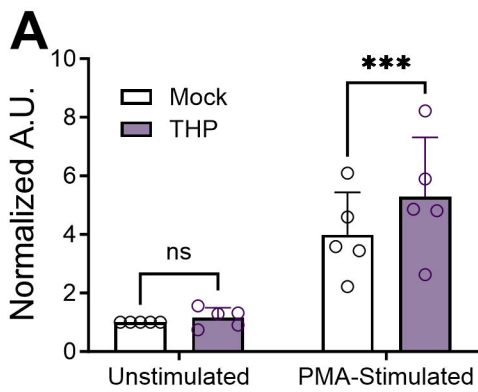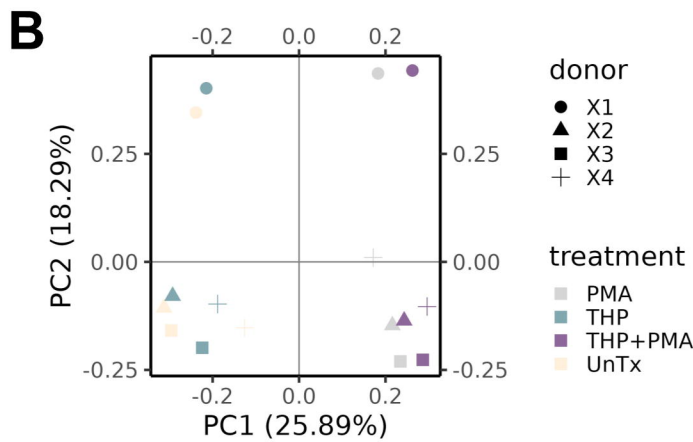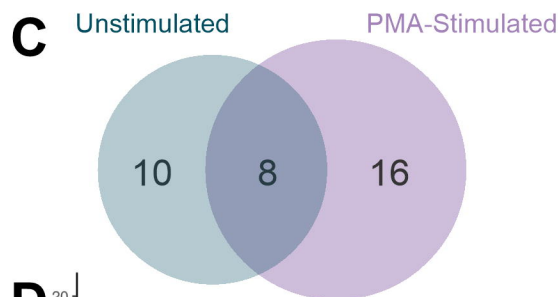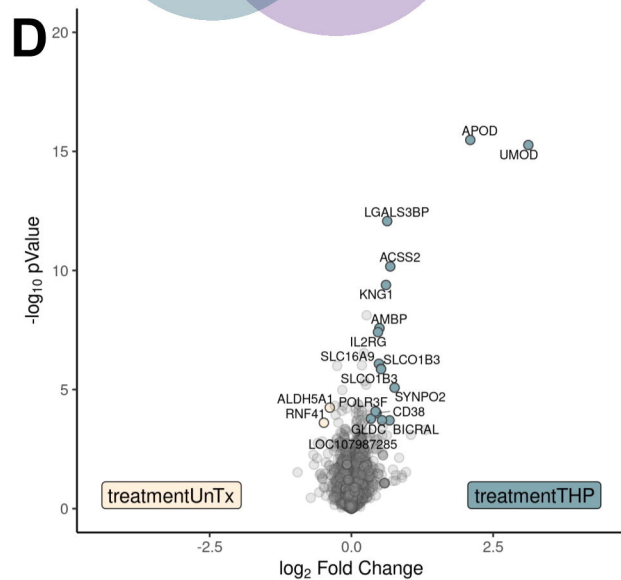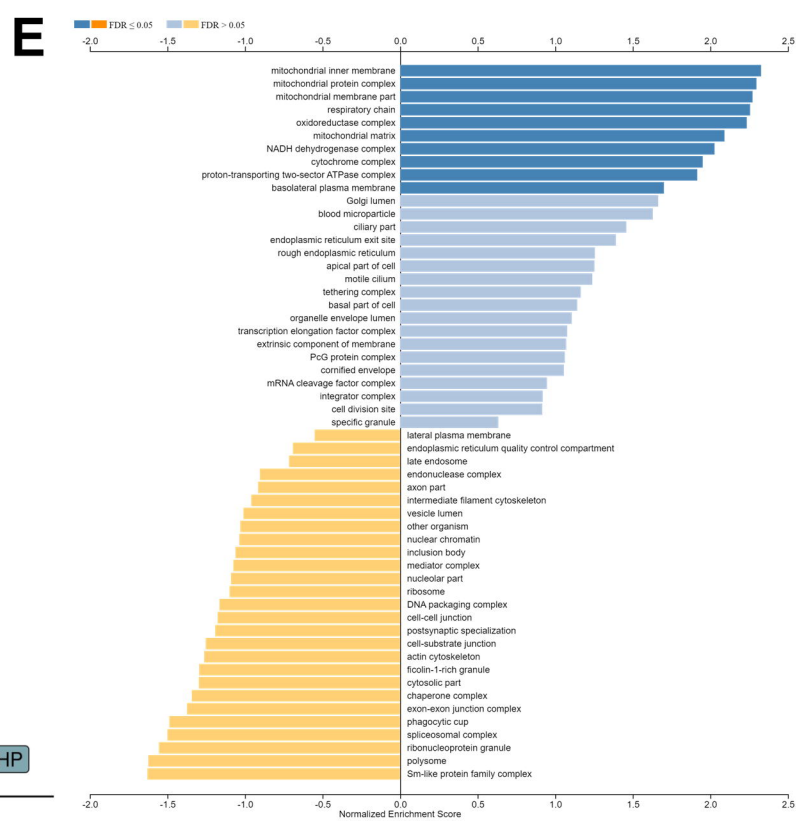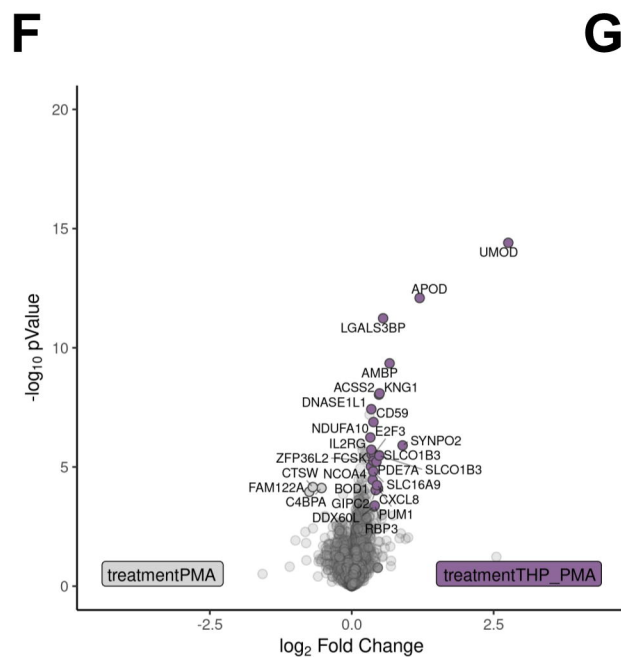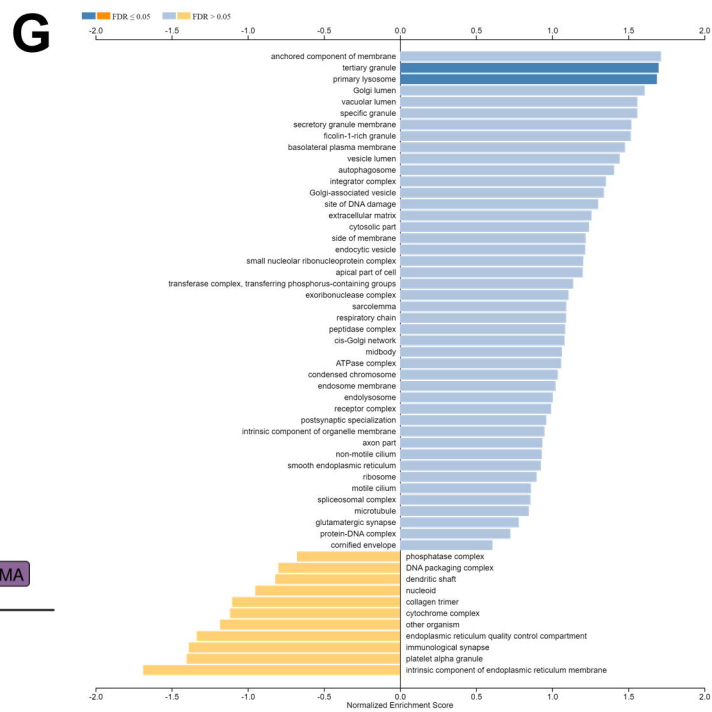

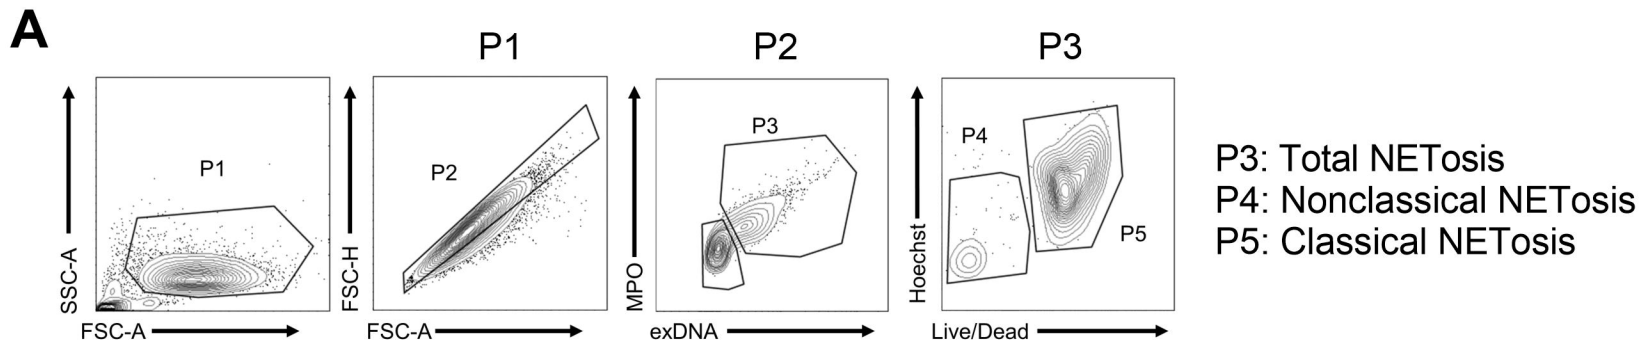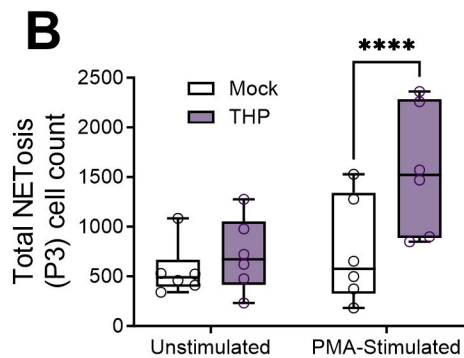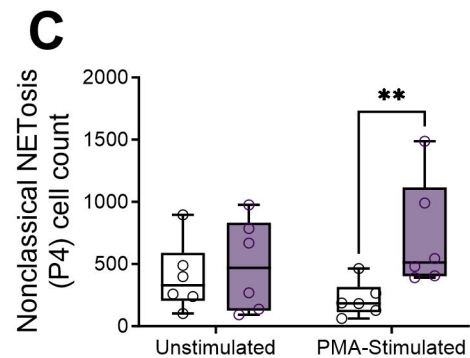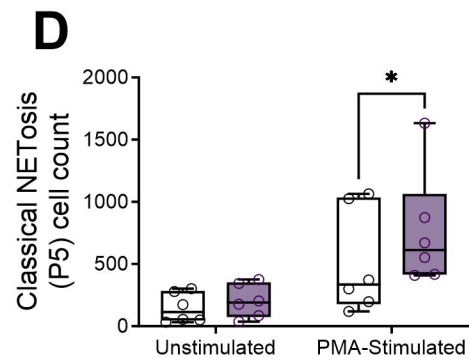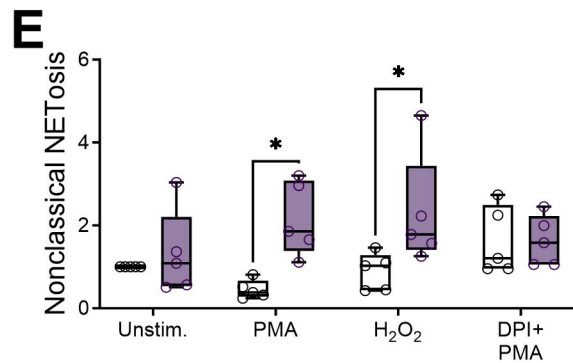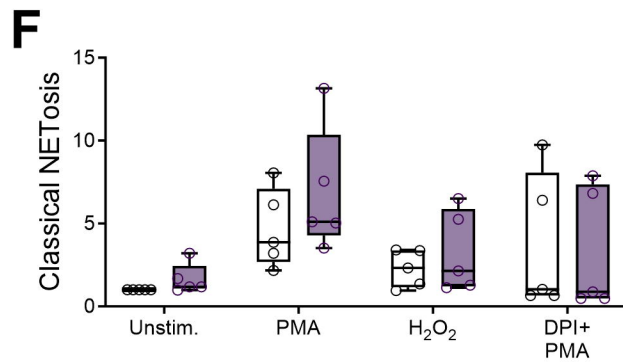

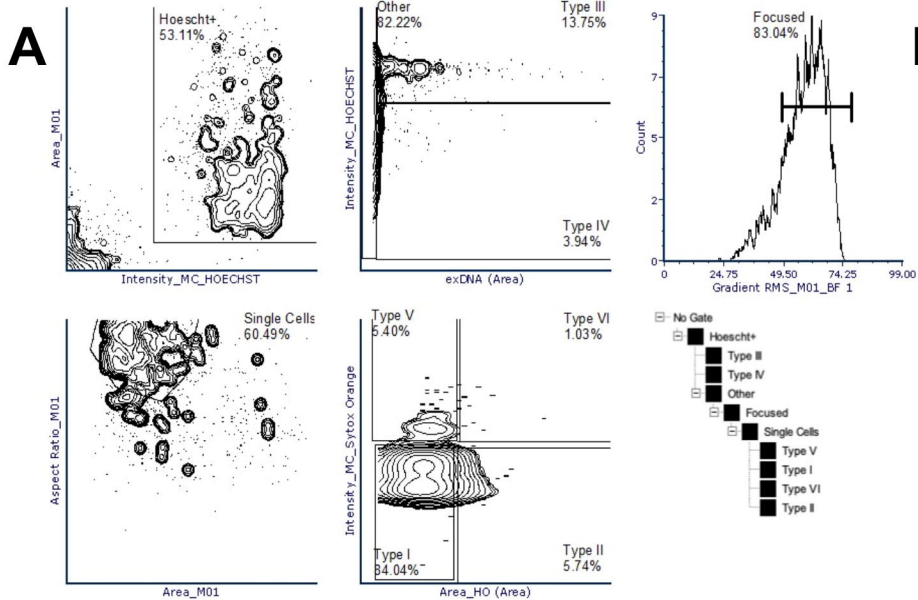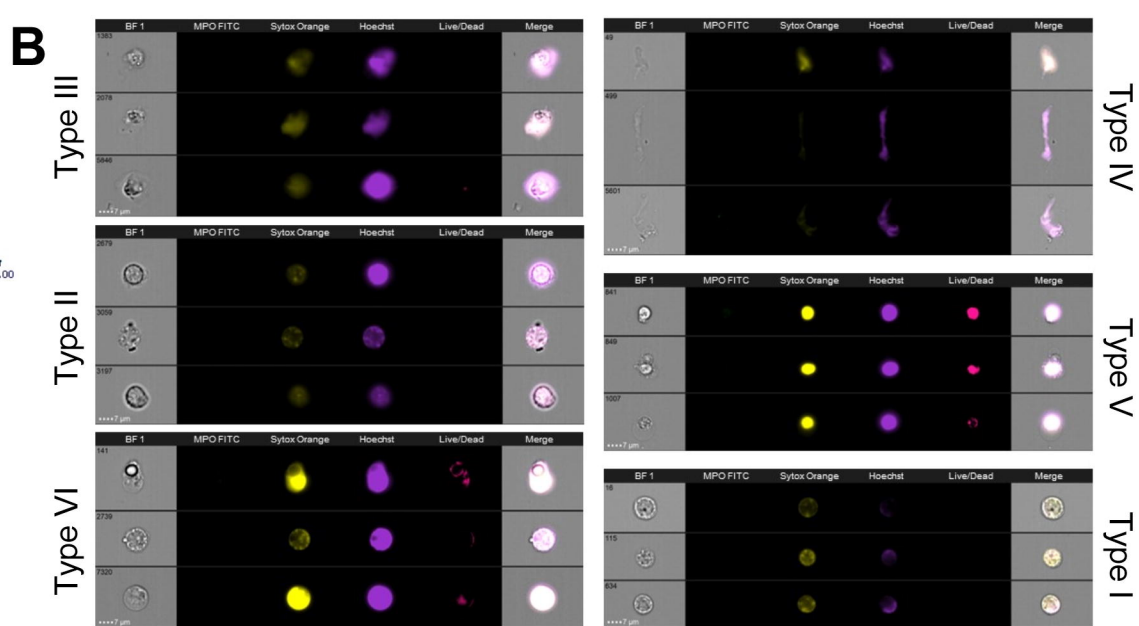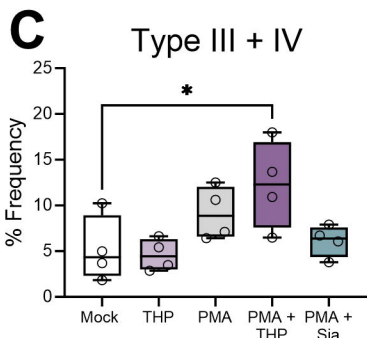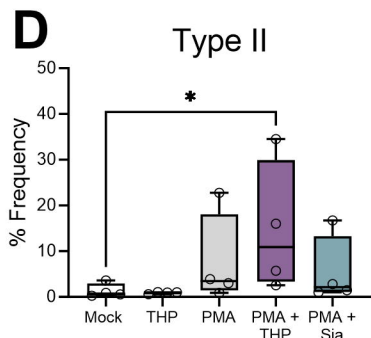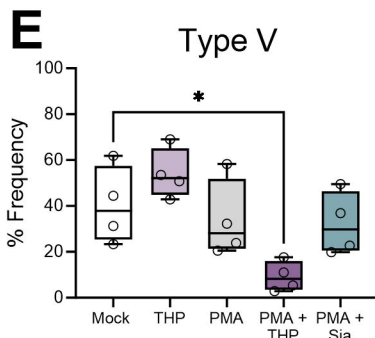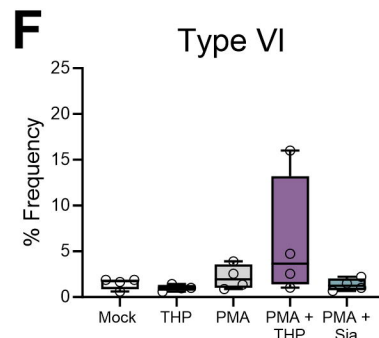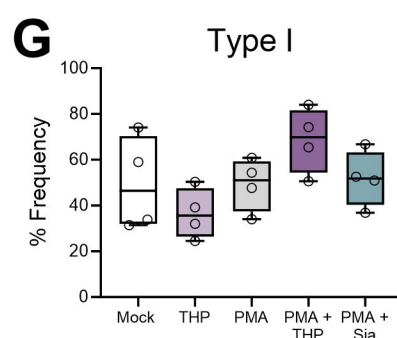

Source: https://www.biorxiv.org/content/biorxiv/early/2024/02/05/2024.02.01.578501.full.pdf
